# Supplementary material for: 1H NMR studies on serum metabonomic changes over time in a kidney-Yang deficiency syndrome model
Source: Royal Society of Chemistry journal article supplement (doi:10.1039/c7ra04057a), 2017-01-01

HMDB ID:HMDB00190

Compound name: L-Lactic acid

Spectrum type: <sup>1</sup>H NMR Spectrum

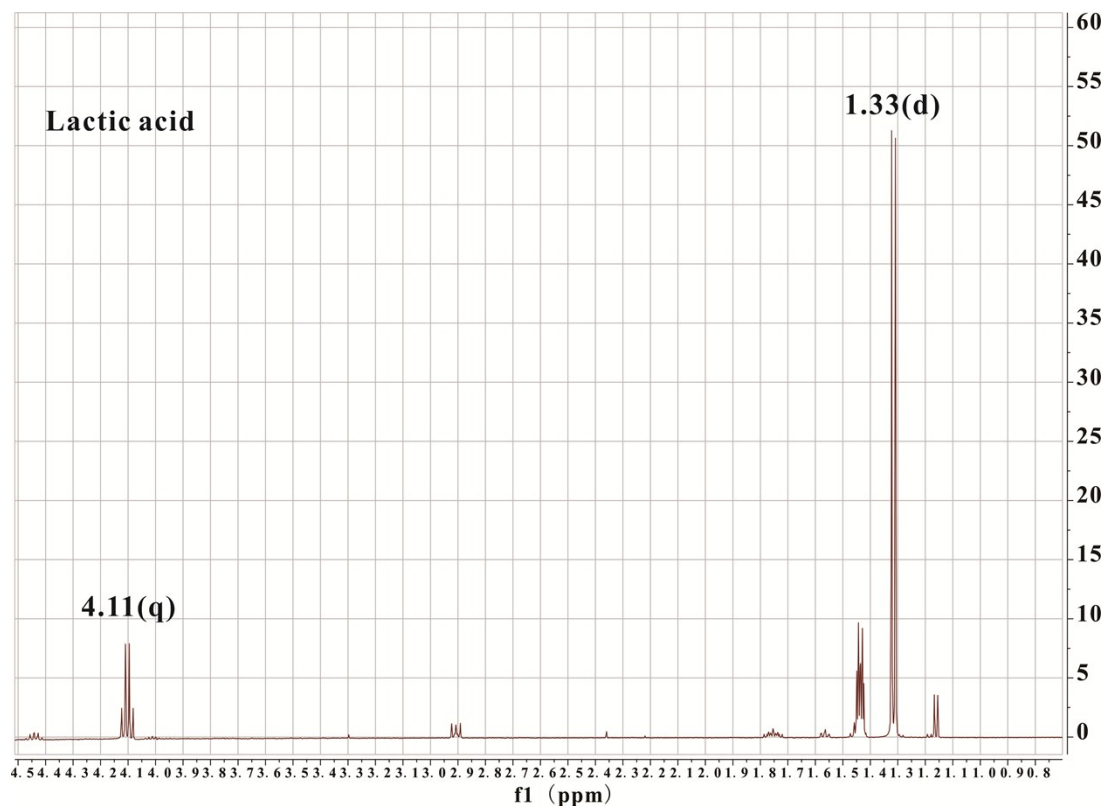

Table of Peaks

| No. | (ppm) | (Hz)   | Height |
|-----|-------|--------|--------|
| 1   | 1.310 | 654.7  | 0.9981 |
| 2   | 1.324 | 661.7  | 1.0000 |
| 3   | 4.084 | 2041.1 | 0.0903 |
| 4   | 4.098 | 2048.1 | 0.2701 |
| 5   | 4.111 | 2055.0 | 0.2663 |
| 6   | 4.125 | 2061.9 | 0.0860 |

Table of Multiplets

| No. | Shift1 (ppm) | H's | Type | J (Hz) | Atom1 | Connected Atoms | Multiplet1 | Connections | (ppm)        |
|-----|--------------|-----|------|--------|-------|-----------------|------------|-------------|--------------|
| 1   | 1.32         | 4   | d    | 6.96   | 3     | 2               | M01        | M02         | 1.30 .. 1.33 |
| 2   | 4.10         | 2   | q    | 6.93   | 2     | 3               | M02        | M01         | 4.08 .. 4.13 |

Table of Assignments

| No. | Atom | Exp. Shift (ppm) | Multiplet |
|-----|------|------------------|-----------|
| 1   | 3    | 1.32             | M01       |
| 2   | 2    | 4.10             | M02       |

Spectra image with peak assignments

Lactic acid  
 HMDB00190  
<sup>1</sup>H NMR Spectrum: 500 Mhz\_0n H  
 Sample: 50 mM at pH 7.0  
 Referenced to DSS

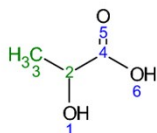

Full <sup>1</sup>H NMR spectrum

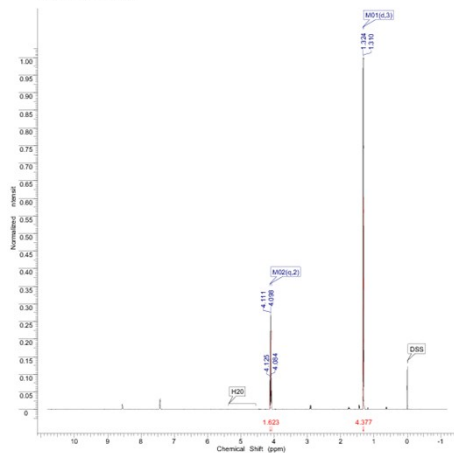

Lactic acid  
 HMDB00190  
<sup>1</sup>H NMR Spectrum: 500 Mhz\_0n H  
 Sample: 50 mM at pH 7.0  
 Referenced to DSS

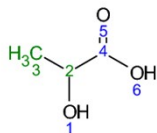

Table of Peaks

| No. | ppm   | Height |
|-----|-------|--------|
| 1   | 1.32  | 0.9681 |
| 2   | 1.324 | 1.0000 |
| 3   | 4.084 | 0.0903 |
| 4   | 4.098 | 0.2701 |
| 5   | 4.111 | 0.2693 |
| 6   | 4.125 | 0.0899 |

Table of Multiplets

| No. | Shift (ppm) | H <sub>s</sub> | Type | J (Hz)     | Absor/Corrected A | Multiplet | Connections | (ppm)         |
|-----|-------------|----------------|------|------------|-------------------|-----------|-------------|---------------|
| 1   | 1.32        | 4              | d    | 6.90       | 3                 | M01       | M02         | [1.30 - 1.35] |
| 2   | 4.10        | 2              | q    | 6.55, 6.61 | 2                 | M02       | 5, M01      | [4.08 - 4.13] |

Table of Assignments

| No. | Atom | Exp. Shift (ppm) | Multiplet |
|-----|------|------------------|-----------|
| 1   | 3    | 1.32             | M01       |
| 2   | 2    | 4.10             | M02       |

Lactic acid  
 HMDB00190  
<sup>1</sup>H NMR Spectrum: 500 Mhz\_0n H  
 Sample: 50 mM at pH 7.0  
 Referenced to DSS

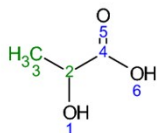

Zoomed <sup>1</sup>H NMR spectrum

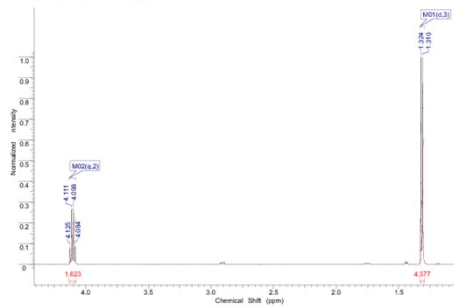

HMDB ID:HMDB00883

Compound name:L-Valine

Spectrum type:1H NMR Spectrum

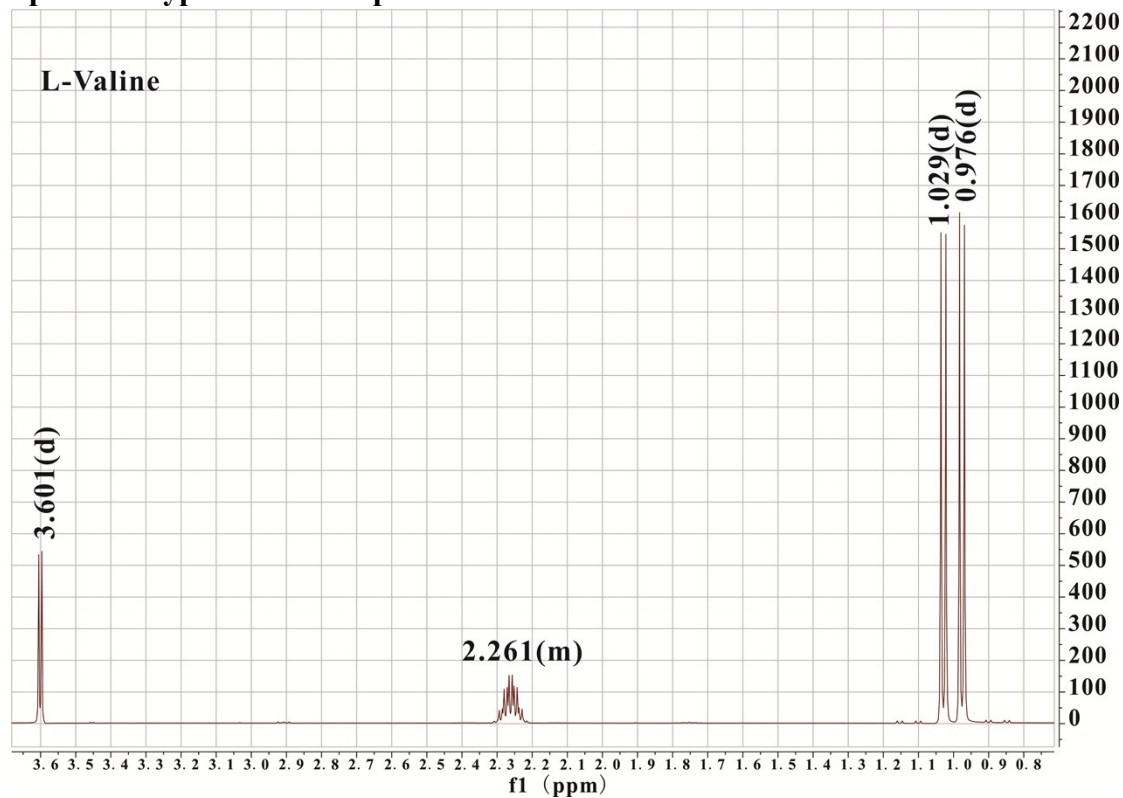

Table of Peaks

| No. | (ppm) | (Hz)    | Height |
|-----|-------|---------|--------|
| 1   | 0.969 | 484.35  | 0.9681 |
| 2   | 0.983 | 491.35  | 1.0000 |
| 3   | 1.022 | 510.70  | 0.9530 |
| 4   | 1.036 | 517.75  | 0.9614 |
| 5   | 2.229 | 1114.12 | 0.0278 |
| 6   | 2.238 | 1118.51 | 0.0304 |
| 7   | 2.243 | 1121.14 | 0.0702 |
| 8   | 2.252 | 1125.49 | 0.0726 |
| 9   | 2.257 | 1128.15 | 0.0941 |
| 10  | 2.266 | 1132.52 | 0.0934 |
| 11  | 2.271 | 1135.16 | 0.0700 |
| 12  | 2.280 | 1139.55 | 0.0669 |
| 13  | 2.285 | 1142.16 | 0.0280 |
| 14  | 2.294 | 1146.58 | 0.0252 |
| 15  | 3.597 | 1797.66 | 0.3374 |
| 16  | 3.605 | 1801.99 | 0.3305 |

### Table of Multiplets

| No. | Shift1 (ppm) | H's | Type | J (Hz)          | Atom1 | Multiplet1 | (ppm)          |
|-----|--------------|-----|------|-----------------|-------|------------|----------------|
| 1   | 0.976        | 3   | d    | 7.01            | 8     | M04        | 0.963 .. 0.990 |
| 2   | 1.029        | 3   | d    | 7.05            | 7     | M03        | 1.012 .. 1.045 |
| 3   | 2.261        | 1   | m    | 14.03 7.01 4.41 | 6     | M02        | 2.207 .. 2.314 |
| 4   | 3.601        | 1   | d    | 4.33            | 4     | M01        | 3.585 .. 3.618 |

### Table of Assignments

| No. | Atom | Exp. Shift (ppm) | Multiplet |
|-----|------|------------------|-----------|
| 1   | 8    | 0.978            | M04       |
| 2   | 7    | 1.029            | M03       |
| 3   | 6    | 2.261            | M02       |
| 4   | 4    | 3.601            | M01       |

Spectra image with peak assignments

L-Valine  
 HMDB00883  
<sup>1</sup>H NMR Spectrum: 500 MHz in H<sub>2</sub>O  
 Sample: 50 mM at pH 7.0  
 Referenced to DSS

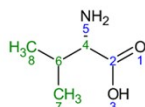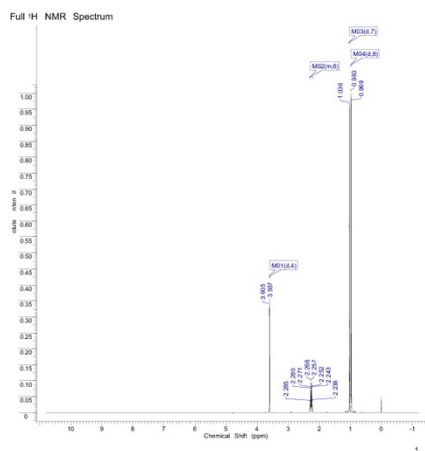

L-Valine  
 HMDB00883  
<sup>1</sup>H NMR Spectrum: 500 MHz in H<sub>2</sub>O  
 Sample: 50 mM at pH 7.0  
 Referenced to DSS

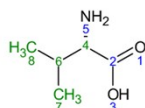

Table of Peaks

| No. | Chem  | Chem    | Height |
|-----|-------|---------|--------|
| 1   | 0.969 | 484.35  | 0.9691 |
| 2   | 0.983 | 491.35  | 1.9692 |
| 3   | 1.032 | 515.79  | 0.9630 |
| 4   | 1.038 | 521.79  | 0.9644 |
| 5   | 2.229 | 1114.12 | 0.0276 |
| 6   | 2.298 | 1151.51 | 0.0304 |
| 7   | 2.343 | 1171.14 | 0.0210 |
| 8   | 2.298 | 1151.51 | 0.0289 |
| 9   | 2.257 | 1128.15 | 0.0441 |
| 10  | 2.298 | 1151.51 | 0.0304 |
| 11  | 2.271 | 1134.16 | 0.0200 |
| 12  | 2.280 | 1139.15 | 0.0089 |
| 13  | 2.285 | 1142.16 | 0.0080 |
| 14  | 2.294 | 1148.18 | 0.0212 |
| 15  | 3.007 | 1501.66 | 0.2374 |
| 16  | 3.005 | 1501.69 | 0.2305 |

Table of Multiplets

| No. | Shift | Split | F <sub>1</sub> | Type  | J (Hz) | Atom1 | Multiplet       | (ppm) |
|-----|-------|-------|----------------|-------|--------|-------|-----------------|-------|
| 1   | 0.976 | 3     | 4              | 7.15  | 6      | M4    | [0.969 - 0.992] |       |
| 2   | 1.039 | 3     | 4              | 7.15  | 7      | M3    | [1.012 - 1.045] |       |
| 3   | 2.281 | 1     | 6              | 16.01 | 6      | M2    | [2.267 - 2.314] |       |
| 4   | 3.007 | 1     | 6              | 4.33  | 4      | M1    | [0.985 - 3.818] |       |

Table of Assignments

| No. | Atom | Chem  | Shift (ppm) | Multiplet |
|-----|------|-------|-------------|-----------|
| 1   | 6    | 0.976 | M4          |           |
| 2   | 7    | 1.039 | M3          |           |
| 3   | 6    | 2.281 | M2          |           |
| 4   | 4    | 3.001 | M1          |           |

2

L-Valine  
 HMDB00883  
<sup>1</sup>H NMR Spectrum: 500 MHz in H<sub>2</sub>O  
 Sample: 50 mM at pH 7.0  
 Referenced to DSS

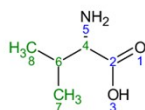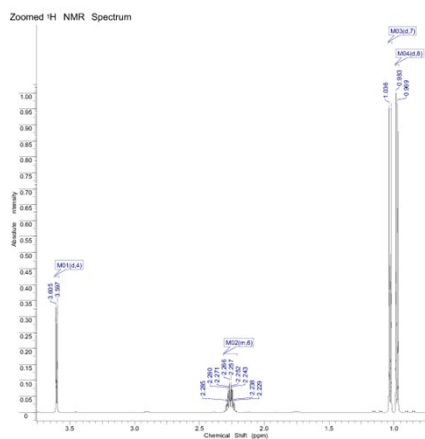

3

HMDB ID:HMDB00161

Compound name: L-Alanine

Spectrum type:1H NMR Spectrum

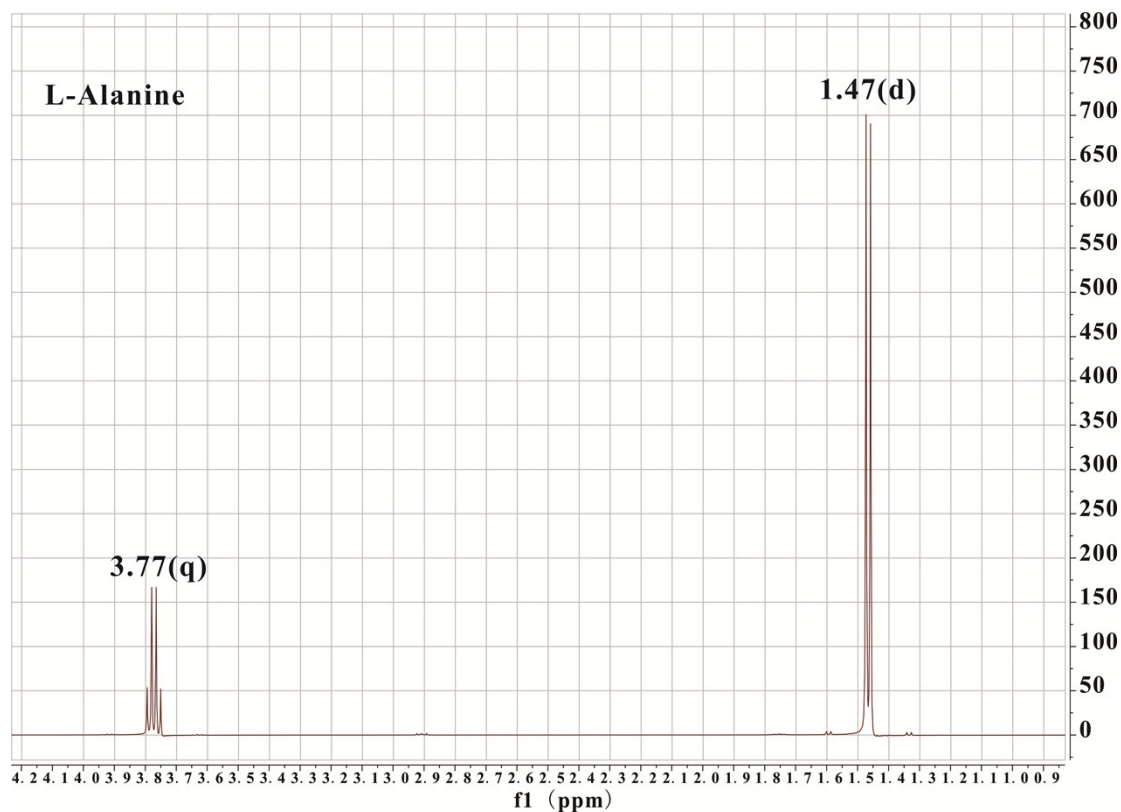

Table of Peaks

| No. | (ppm) | (Hz)   | Height |
|-----|-------|--------|--------|
| 1   | 1.459 | 729.3  | 0.9806 |
| 2   | 1.474 | 736.5  | 1.0000 |
| 3   | 3.751 | 1874.9 | 0.0631 |
| 4   | 3.766 | 1882.2 | 0.2025 |
| 5   | 3.780 | 1889.4 | 0.2030 |
| 6   | 3.795 | 1896.6 | 0.0649 |

Table of Multiplets

| No. | Shift1 (ppm) | H's | Type | J (Hz) | Atom1 | Multiplet1 | (ppm)        |
|-----|--------------|-----|------|--------|-------|------------|--------------|
| 1   | 1.47         | 5   | d    | 7.28   | 6     | M02        | 1.41 .. 1.52 |
| 2   | 3.77         | 1   | q    | 7.23   | 4     | M01        | 3.73 .. 3.83 |

Table of Assignments

| No. | Atom | Exp. Shift (ppm) | Multiplet |
|-----|------|------------------|-----------|
| 1   | 6    | 1.47             | M02       |
| 2   | 4    | 3.77             | M01       |

Spectra image with peak assignments

L-Alanine

HMDB00161

<sup>1</sup>H NMR spectrum: 500 MHz in H<sub>2</sub>O

Sample: 50 mM at pH 7.0

Referenced to DSS

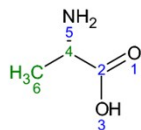

Full <sup>1</sup>H NMR Spectrum

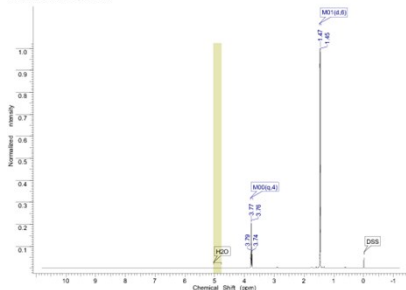

1

L-Alanine

HMDB00161

<sup>1</sup>H NMR spectrum: 500 MHz in H<sub>2</sub>O

Sample: 50 mM at pH 7.0

Referenced to DSS

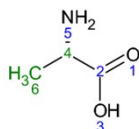

Table of Peaks

| No. | Chem | Int    | Height |
|-----|------|--------|--------|
| 1   | 3.73 | 1832.8 | 0.2673 |
| 2   | 3.77 | 1833.4 | 0.2678 |
| 3   | 3.76 | 1838.1 | 0.2684 |
| 4   | 3.75 | 1837.9 | 0.2683 |
| 5   | 4.7  | 725.3  | 0.9952 |
| 6   | 1.45 | 725.3  | 0.9952 |

Table of Multiplets

| No. | Start | Stop | Type | F (Hz) | Atom1 | Multiplet | Int  |
|-----|-------|------|------|--------|-------|-----------|------|
| 1   | 4.6   | 4.8  | 7.20 | 0      | 300   | 1372      | 3.60 |
| 2   | 3.70  | 3.8  | 7.20 | 0      | 300   | 1372      | 3.60 |

Table of Assignments

| No. | Atom | Exp. Shift (ppm) | Multiplet |
|-----|------|------------------|-----------|
| 1   | 4    | 3.76             | MQQ       |
| 2   | 4    | 3.76             | MQQ       |

2

L-Alanine

HMDB00161

<sup>1</sup>H NMR spectrum: 500 MHz in H<sub>2</sub>O

Sample: 50 mM at pH 7.0

Referenced to DSS

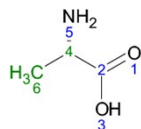

Zoomed <sup>1</sup>H NMR Spectrum

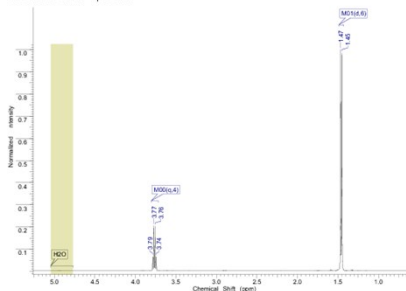

HMDB ID:HMDB00042

Compound name: Acetic acid

Spectrum type:  $^1\text{H}$  NMR Spectrum

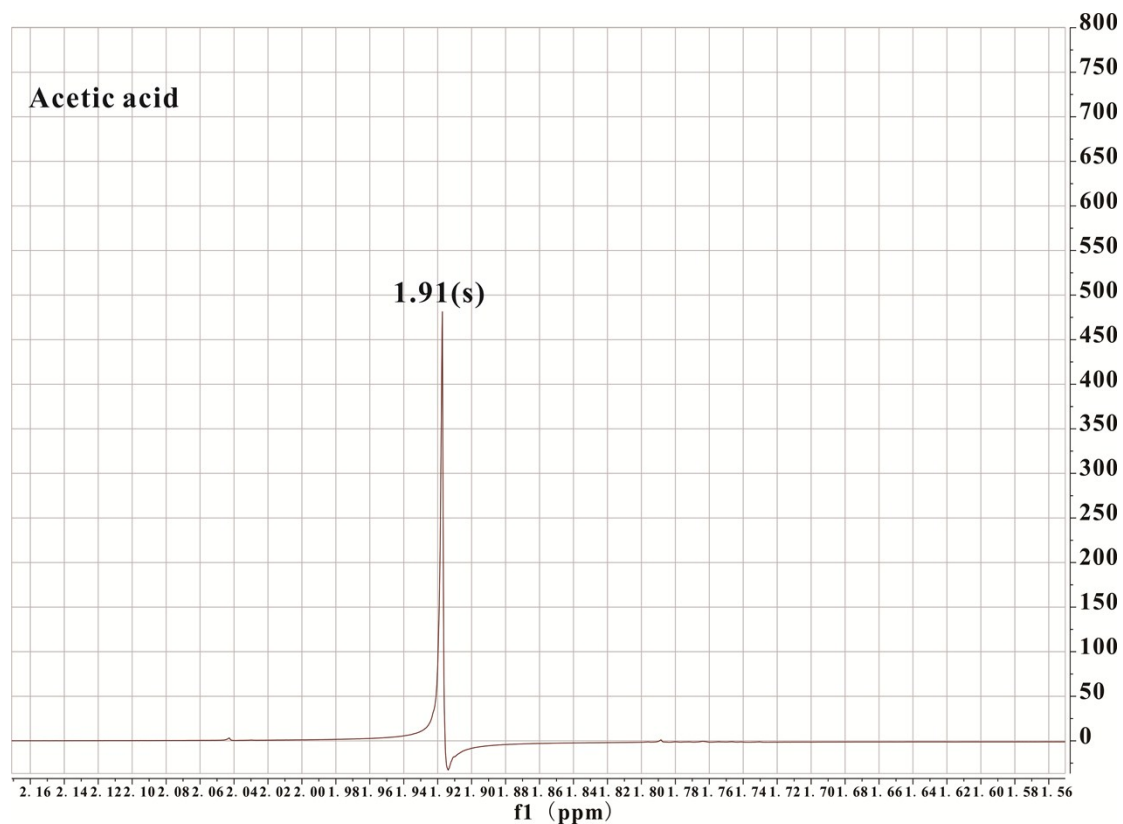

#### Table of Peaks

| No. | (ppm) | (Hz)  | Height |
|-----|-------|-------|--------|
| 1   | 1.91  | 953.8 | 1.0000 |

#### Table of Multiplets

| No. | Shift1 (ppm) | H's | Type | Atom1 | Multiplet1 | (ppm)        |
|-----|--------------|-----|------|-------|------------|--------------|
| 1   | 1.91         | 3   | s    | 4     | M01        | 1.89 .. 1.93 |

#### Table of Assignments

| No. | Atom | Exp. Shift (ppm) | Multiplet |
|-----|------|------------------|-----------|
| 1   | 4    | 1.91             | M01       |

Spectra image with peak assignments



Acetic acid  
 HMDB00042  
<sup>1</sup>H NMR spectrum: 500 MHz in H<sub>2</sub>O  
 Sample: 23 mM at pH 7.0  
 Referenced to DSS

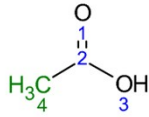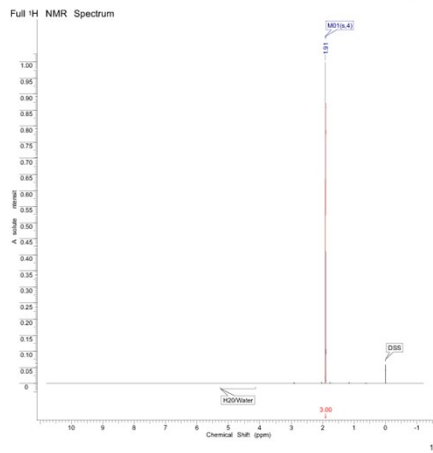

Acetic acid  
 HMDB00042  
<sup>1</sup>H NMR spectrum: 500 MHz in H<sub>2</sub>O  
 Sample: 23 mM at pH 7.0  
 Referenced to DSS

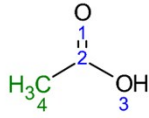

Table of Peaks

| No. | Chem. Shift (ppm) | Height |
|-----|-------------------|--------|
| 1   | 1.91              | 953.8  |

Table of Multiplets

| No. | Chem. Shift (ppm) | Type | Atom | Multiplet | (ppm)         |
|-----|-------------------|------|------|-----------|---------------|
| 1   | 1.91              | s    | 4    | MS1       | (1.89 - 1.93) |

Table of Assignments

| No. | Atom | Exp. Shift (ppm) | Multiplet |
|-----|------|------------------|-----------|
| 1   | 4    | 1.91             | MS1       |

Acetic acid  
 HMDB00042  
<sup>1</sup>H NMR spectrum: 500 MHz in H<sub>2</sub>O  
 Sample: 23 mM at pH 7.0  
 Referenced to DSS

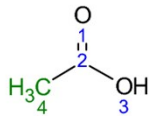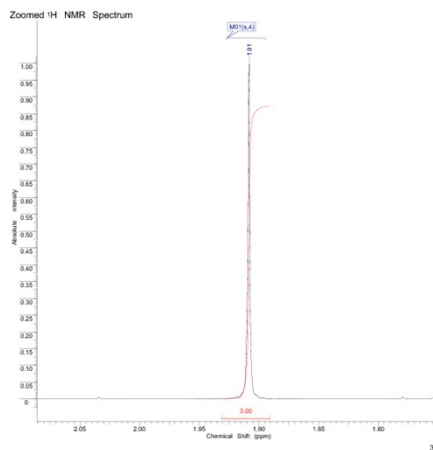

HMDB ID:HMDB00696

Compound name: L-Methionine

Spectrum type:1H NMR Spectrum

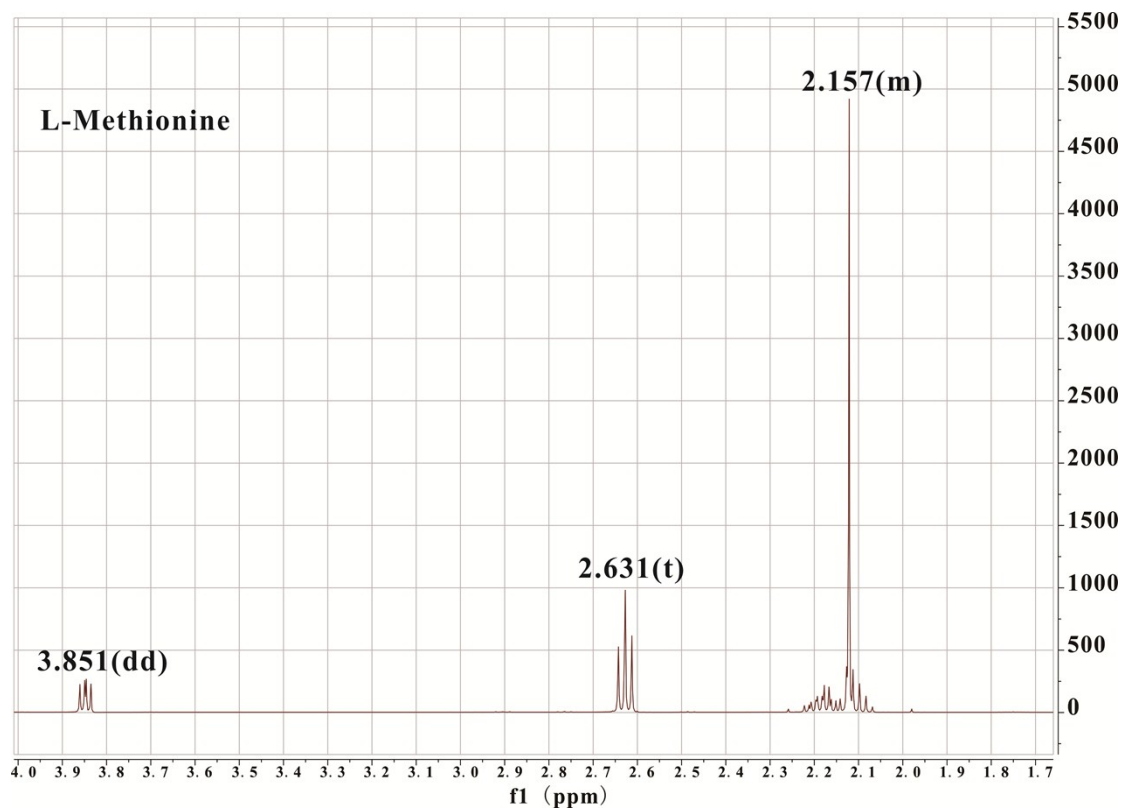

Table of Peaks

| No. | (ppm) | (Hz)   | Height |
|-----|-------|--------|--------|
| 1   | 2.072 | 1035.7 | 0.0504 |
| 2   | 2.087 | 1042.9 | 0.1393 |
| 3   | 2.101 | 1050.3 | 0.2369 |
| 4   | 2.116 | 1057.6 | 0.3919 |
| 5   | 2.125 | 1062.1 | 4.0000 |
| 6   | 2.145 | 1072.2 | 0.1229 |
| 7   | 2.155 | 1077.0 | 0.1032 |
| 8   | 2.166 | 1082.4 | 0.1158 |
| 9   | 2.170 | 1084.8 | 0.2087 |
| 10  | 2.181 | 1090.2 | 0.2200 |
| 11  | 2.186 | 1092.5 | 0.1513 |
| 12  | 2.197 | 1098.0 | 0.1490 |
| 13  | 2.211 | 1105.1 | 0.0915 |
| 14  | 2.215 | 1107.3 | 0.0671 |
| 15  | 2.226 | 1112.7 | 0.0553 |
| 16  | 2.616 | 1307.6 | 0.6028 |
| 17  | 2.631 | 1315.1 | 1.0261 |
| 21  | 3.853 | 1925.8 | 0.3290 |
| 22  | 3.864 | 1931.2 | 0.2721 |

### Table of Multiplets

| No. | Shift1 (ppm) | H's | Type | J (Hz)      | Atom1 | Multiplet1 | (ppm)          |
|-----|--------------|-----|------|-------------|-------|------------|----------------|
| 1   | 2.157        | 31  | m    | -           | 2 4   | M01        | 2.055 .. 2.241 |
| 2   | 2.631        | 13  | t    | 7.587       | 3     | M02        | 2.593 .. 2.673 |
| 3   | 3.851        | 6   | d    | 7.100 5.382 | 5     | M03        | 3.818 .. 3.888 |

### Table of Assignments

| No. | Atom | Exp. Shift (ppm) | Multiplet |
|-----|------|------------------|-----------|
| 1   | 2    | 2.157            | M01       |
| 2   | 4    | 2.157            | M01       |
| 3   | 3    | 2.631            | M02       |
| 4   | 5    | 3.851            | M03       |

Spectra image with peak assignments

L-Methionine  
HMDB00696  
<sup>1</sup>H NMR Spectrum: 500 MHz in H<sub>2</sub>O  
Sample: 50 mM at pH 7.0  
Referenced to DSS

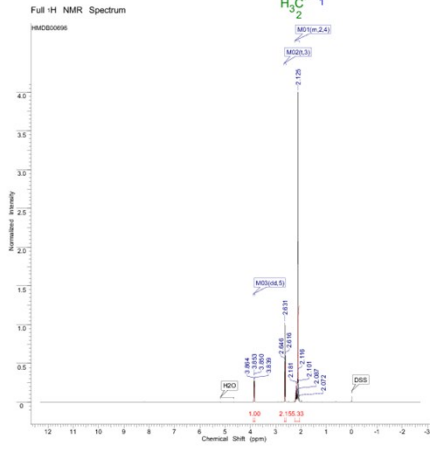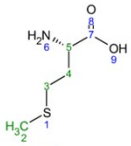

L-Methionine  
HMDB00696  
<sup>1</sup>H NMR Spectrum: 500 MHz in H<sub>2</sub>O  
Sample: 50 mM at pH 7.0  
Referenced to DSS

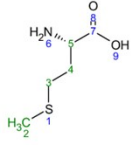

Table of Peaks

| No. | (ppm) | (Hz)   | Height |
|-----|-------|--------|--------|
| 1   | 2.072 | 1036.7 | 0.0504 |
| 2   | 2.087 | 1042.9 | 0.1393 |
| 3   | 2.101 | 1050.3 | 0.3288 |
| 4   | 2.116 | 1057.6 | 0.3819 |
| 5   | 2.131 | 1065.1 | 0.4000 |
| 6   | 2.145 | 1072.2 | 0.1229 |
| 7   | 2.160 | 1079.0 | 0.1024 |
| 8   | 2.166 | 1082.4 | 0.1158 |
| 9   | 2.170 | 1084.8 | 0.2087 |
| 10  | 2.181 | 1092.2 | 0.2250 |
| 11  | 2.186 | 1092.5 | 0.1513 |
| 12  | 2.197 | 1098.0 | 0.1480 |
| 13  | 2.211 | 1105.1 | 0.0915 |
| 14  | 2.235 | 1120.3 | 0.0671 |
| 15  | 2.228 | 1112.7 | 0.0553 |
| 16  | 2.616 | 1307.6 | 0.0020 |
| 17  | 2.631 | 1315.1 | 1.0281 |
| 18  | 2.668 | 1322.7 | 0.0276 |
| 19  | 3.829 | 1916.7 | 0.2778 |
| 20  | 3.850 | 1924.1 | 0.3262 |
| 21  | 3.853 | 1925.8 | 0.3290 |
| 22  | 3.864 | 1931.2 | 0.2721 |

Table of Assignments

| No. | Atom | Exp.  | Shift (ppm) | Multiplet |
|-----|------|-------|-------------|-----------|
| 1   | 2    | 2.157 | M3(1)       |           |
| 2   | 4    | 2.157 | M3(1)       |           |
| 3   | 3    | 2.851 | M3(2)       |           |
| 4   | 5    | 3.851 | M3(3)       |           |

Table of Multiplets

| No. | Shift (ppm) | Int. | Type | J (Hz)      | Abert | Multiplet | (ppm)           |
|-----|-------------|------|------|-------------|-------|-----------|-----------------|
| 1   | 2.157       | 31   | m    | -           | 2, 4  | M3(1)     | (2.055 - 2.241) |
| 2   | 2.851       | 13   | l    | 7.587       | 3     | M3(2)     | (2.859 - 2.878) |
| 3   | 3.851       | 6    | bc   | 7.100, 5.3M | 5     | M3(3)     | (3.818 - 3.886) |

L-Methionine  
HMDB00696  
<sup>1</sup>H NMR Spectrum: 500 MHz in H<sub>2</sub>O  
Sample: 50 mM at pH 7.0  
Referenced to DSS

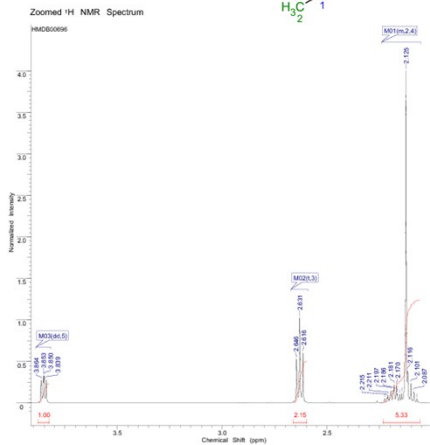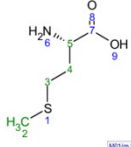

HMDB ID:HMDB00357

Compound name: 3-Hydroxybutyric acid

Spectrum type: <sup>1</sup>H NMR Spectrum

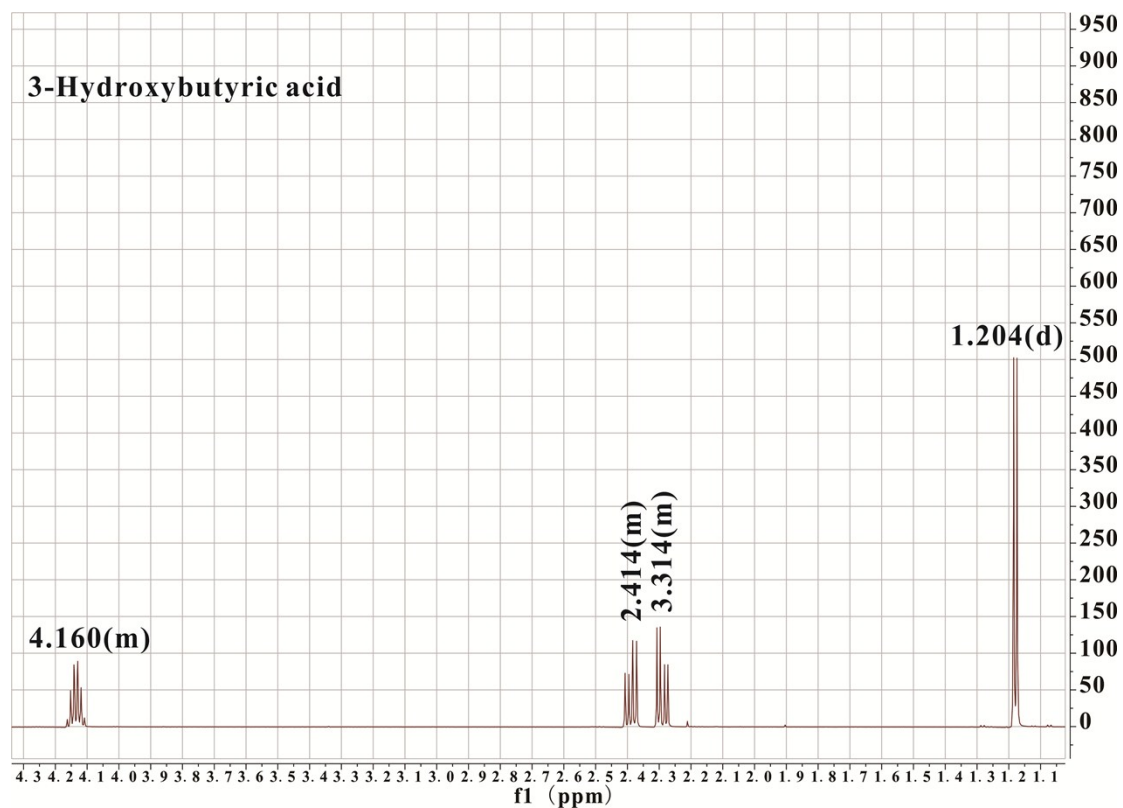

Table of Peaks

| No. | (ppm) | (Hz)   | Height |
|-----|-------|--------|--------|
| 1   | 1.199 | 718.5  | 3.9858 |
| 2   | 1.209 | 724.7  | 4.0000 |
| 3   | 2.297 | 1376.9 | 0.5522 |
| 4   | 2.308 | 1383.3 | 0.5618 |
| 5   | 2.321 | 1391.3 | 0.8961 |
| 6   | 2.332 | 1397.6 | 0.8974 |
| 7   | 2.396 | 1436.0 | 0.8380 |
| 8   | 2.408 | 1443.3 | 0.8469 |
| 9   | 2.420 | 1450.4 | 0.5232 |
| 10  | 2.432 | 1457.7 | 0.5283 |
| 11  | 4.133 | 2477.4 | 0.0808 |
| 12  | 4.144 | 2483.7 | 0.3505 |
| 13  | 4.154 | 2490.0 | 0.6180 |
| 14  | 4.166 | 2497.1 | 0.6064 |
| 15  | 4.177 | 2503.4 | 0.3419 |
| 16  | 4.187 | 2509.7 | 0.0792 |

### Table of Multiplets

| No. | Shift1 (ppm) | H's | Type | J (Hz) | Atom1 | Multiplet1 | (ppm)          |
|-----|--------------|-----|------|--------|-------|------------|----------------|
| 1   | 1.204        | 39  | d    | 6.262  | 3     | M01        | 1.188 .. 1.220 |
| 2   | 2.314        | 14  | m    | -      | 4     | M02        | 2.289 .. 2.342 |
| 3   | 2.414        | 14  | m    | -      | 4     | M03        | 2.387 .. 2.440 |
| 4   | 4.160        | 13  | m    | -      | 2     | M04        | 4.127 .. 4.192 |

### Table of Assignments

| No. | Atom | Exp. Shift (ppm) | Multiplet |
|-----|------|------------------|-----------|
| 1   | 3    | 1.204            | M01       |
| 2   | 4    | 2.314            | M02       |
| 3   | 4    | 2.414            | M03       |
| 4   | 2    | 4.160            | M04       |

Spectra image with peak assignments

3-Hydroxybutyric acid  
 HMDB00357  
 1H NMR Spectrum: 500 MHz in H2O  
 Sample: 50 mM AT pH 7.0  
 Referenced to DSS

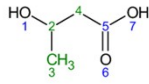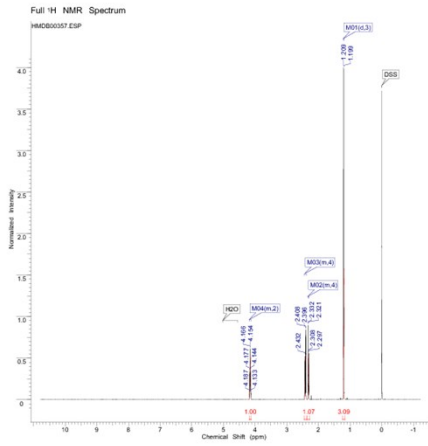

3-Hydroxybutyric acid  
 HMDB00357  
 1H NMR Spectrum: 500 MHz in H2O  
 Sample: 50 mM AT pH 7.0  
 Referenced to DSS

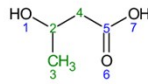

Table of Peaks

| No. | (ppm) | (Hz)   | Height |
|-----|-------|--------|--------|
| 1   | 1.199 | 718.5  | 3.9658 |
| 2   | 1.209 | 724.7  | 4.0000 |
| 3   | 2.297 | 1376.0 | 0.9552 |
| 4   | 2.306 | 1383.3 | 0.9618 |
| 5   | 2.321 | 1391.3 | 0.8991 |
| 6   | 2.332 | 1397.6 | 0.9074 |
| 7   | 2.356 | 1434.0 | 0.8380 |
| 8   | 2.408 | 1443.3 | 0.8493 |
| 9   | 2.420 | 1450.4 | 0.8232 |
| 10  | 2.432 | 1457.7 | 0.8083 |
| 11  | 4.133 | 2477.4 | 0.0808 |
| 12  | 4.144 | 2483.7 | 0.3055 |
| 13  | 4.156 | 2490.0 | 0.1930 |
| 14  | 4.166 | 2497.1 | 0.8064 |
| 15  | 4.177 | 2503.4 | 0.3479 |
| 16  | 4.187 | 2509.7 | 0.0792 |

Table of Multiplets

| No. | Start (ppm) | End (ppm) | Integ. | J (Hz) | AbnInt | Multiplet | (ppm)           |
|-----|-------------|-----------|--------|--------|--------|-----------|-----------------|
| 1   | 1.204       | 39        | d      | 6.262  | 3      | M01       | [1.188 - 1.220] |
| 2   | 2.314       | 16        | m      | -      | 4      | M02       | [2.289 - 2.342] |
| 3   | 2.414       | 14        | m      | -      | 4      | M03       | [2.387 - 2.440] |
| 4   | 4.160       | 13        | m      | -      | 2      | M04       | [4.127 - 4.192] |

Table of Assignments

| No. | Atom | Exp. Shift (ppm) | Multiplet |
|-----|------|------------------|-----------|
| 1   | 3    | 1.204            | M01       |
| 2   | 4    | 2.314            | M02       |
| 3   | 4    | 2.414            | M03       |
| 4   | 2    | 4.160            | M04       |

3-Hydroxybutyric acid  
 HMDB00357  
 1H NMR Spectrum: 500 MHz in H2O  
 Sample: 50 mM AT pH 7.0  
 Referenced to DSS

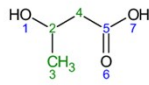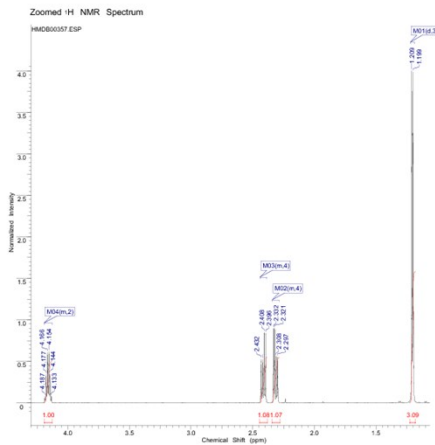

HMDB ID:HMDB00254

Compound name:Succinic acid

Spectrum type:1H NMR Spectrum

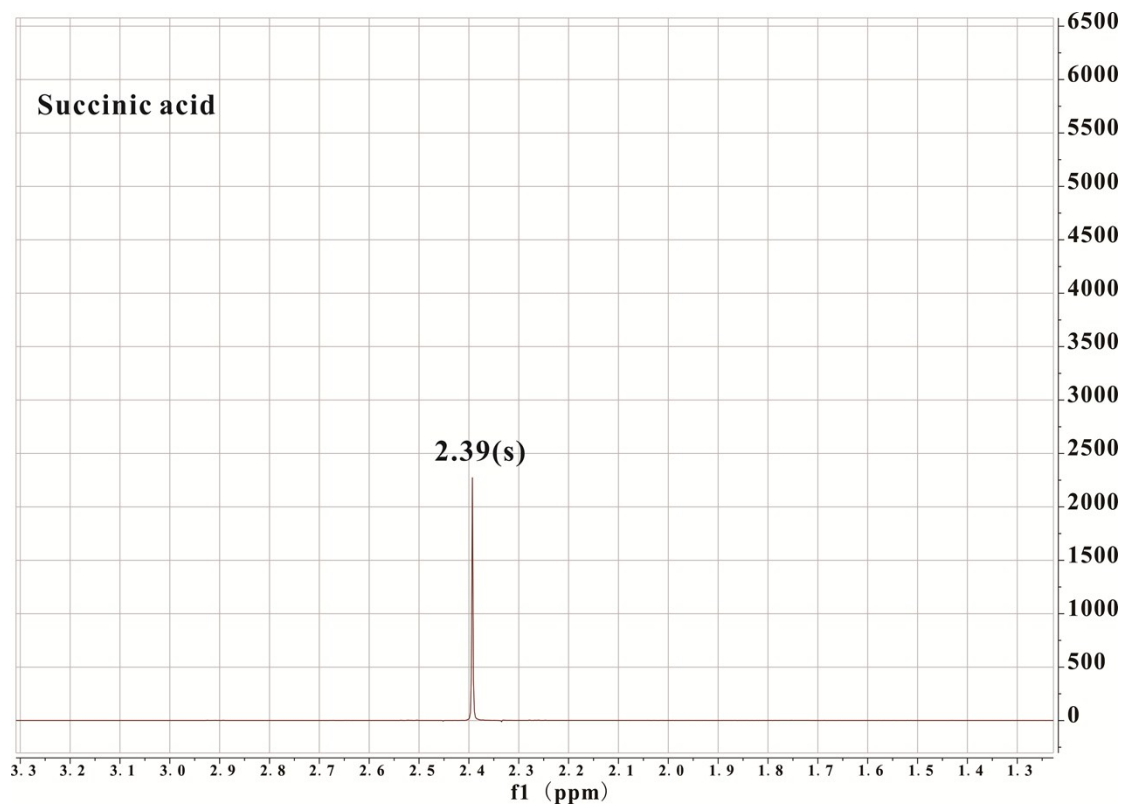

### Table of Peaks

| No. | (ppm) | (Hz)   | Height |
|-----|-------|--------|--------|
| 1   | 2.393 | 1196.3 | 1.0000 |

### Table of Multiplets

| No. | Shift1 (ppm) | H's | Type | Atom1 | Multiplet1 | (ppm)        |
|-----|--------------|-----|------|-------|------------|--------------|
| 1   | 2.39         | 93  | s    | 5 4   | M01        | 2.38 .. 2.41 |

### Table of Assignments

| No. | Atom | Exp. Shift (ppm) | Multiplet |
|-----|------|------------------|-----------|
| 1   | 5    | 2.39             | M01       |
| 2   | 4    | 2.39             | M01       |

Spectra image with peak assignments



Succinic acid  
 HMDB00254  
<sup>1</sup>H NMR spectrum: 500 MHz, Qn H  
 Sample: 50mM at pH 7.0  
 Referenced to DSS

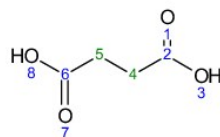

Full <sup>1</sup>H NMR spectrum

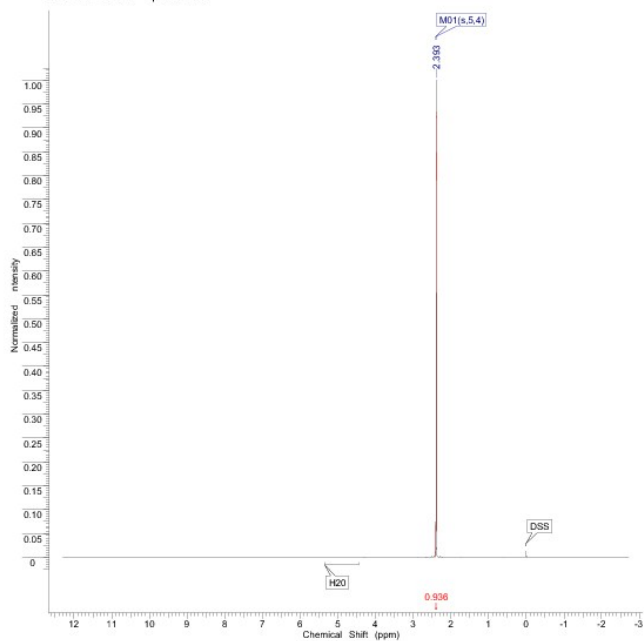

Succinic acid  
 HMDB00254  
<sup>1</sup>H NMR spectrum: 500 MHz, Qn H  
 Sample: 50mM at pH 7.0  
 Referenced to DSS

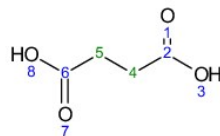

Table of Peaks

| No. | Shift1 (ppm) | H's | Type | Atom1 | Multiplet1 | (ppm)          |
|-----|--------------|-----|------|-------|------------|----------------|
| 1   | 2.39         | 93  | s    | 5, 4  | M01        | [2.38 .. 2.41] |

Table of Multiplets

| No. | (ppm) | Height |
|-----|-------|--------|
| 1   | 2.393 | 1.0000 |

Table of Assignments

| No. | Atom | Exp. | Shift (ppm) | Multiplet |
|-----|------|------|-------------|-----------|
| 1   | 5    | 2.39 |             | M01       |
| 2   | 4    | 2.39 |             | M01       |

Zoomed <sup>1</sup>H NMR spectrum

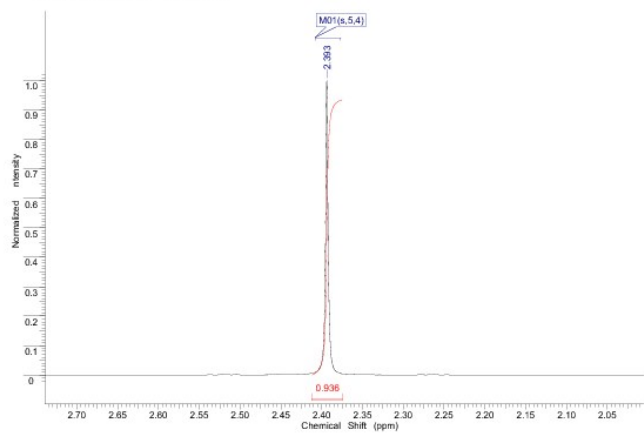

HMDB ID:HMDB00641

Compound name: L-Glutamine

Spectrum type:1H NMR Spectrum

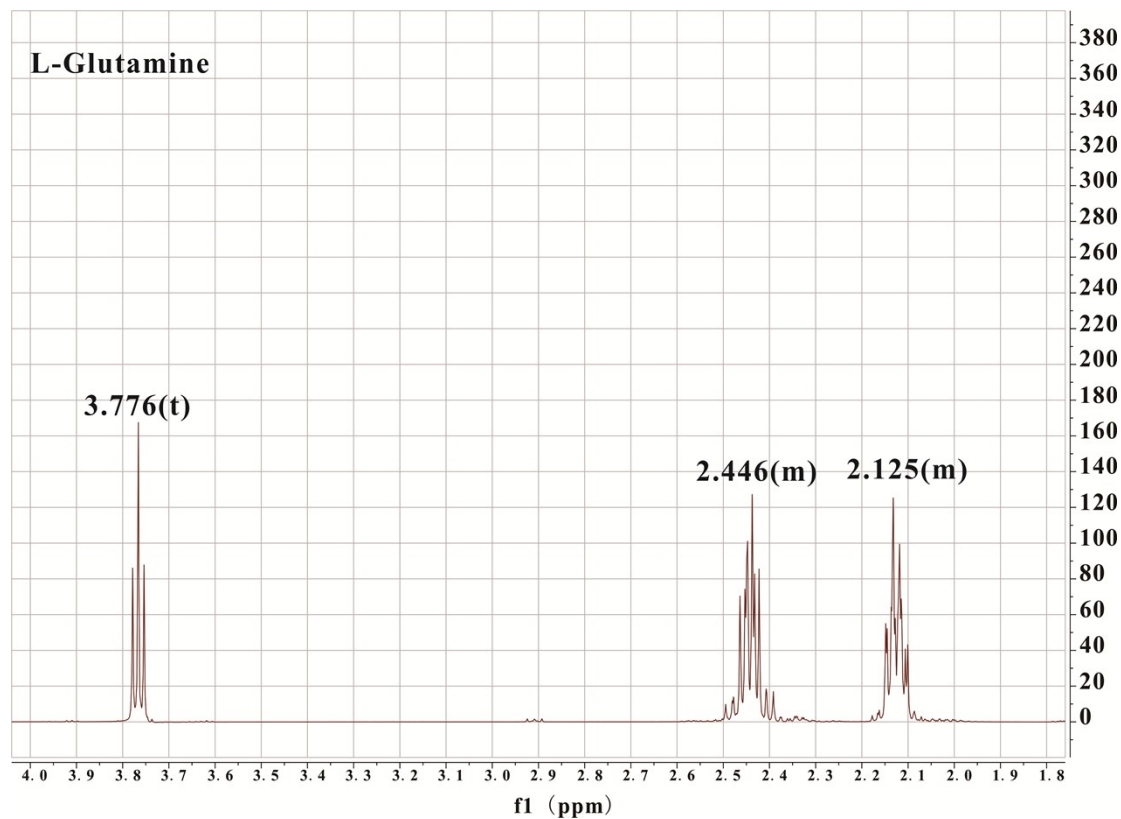

Table of Peaks

| No. | (ppm) | (Hz)    | Height | No. | (ppm) | (Hz)    | Height |
|-----|-------|---------|--------|-----|-------|---------|--------|
| 1   | 2.086 | 1042.87 | 0.0438 | 15  | 2.407 | 1203.22 | 0.1308 |
| 2   | 2.101 | 1049.97 | 0.3039 | 16  | 2.422 | 1210.82 | 0.6081 |
| 3   | 2.106 | 1052.58 | 0.2769 | 17  | 2.432 | 1215.58 | 0.5646 |
| 4   | 2.115 | 1057.07 | 0.4611 | 18  | 2.438 | 1218.38 | 0.8876 |
| 5   | 2.118 | 1058.76 | 0.6724 | 19  | 2.447 | 1223.18 | 0.6860 |
| 6   | 2.120 | 1059.49 | 0.5773 | 20  | 2.449 | 1224.19 | 0.6285 |
| 7   | 2.122 | 1060.64 | 0.4401 | 21  | 2.453 | 1226.07 | 0.5102 |
| 8   | 2.128 | 1063.52 | 0.3889 | 22  | 2.464 | 1231.47 | 0.4812 |
| 9   | 2.132 | 1065.67 | 0.8706 | 23  | 2.478 | 1238.48 | 0.0929 |
| 10  | 2.136 | 1067.83 | 0.4371 | 24  | 2.480 | 1239.81 | 0.0780 |
| 11  | 2.145 | 1072.22 | 0.3668 | 25  | 2.495 | 1246.95 | 0.0684 |
| 12  | 2.148 | 1073.82 | 0.3791 | 26  | 3.754 | 1876.22 | 0.5095 |
| 13  | 2.162 | 1080.78 | 0.0404 | 27  | 3.766 | 1882.40 | 1.0000 |
| 14  | 2.392 | 1195.39 | 0.1213 | 28  | 3.778 | 1888.58 | 0.5318 |

### Table of Multiplets

| No. | Shift1<br>(ppm) | H's | Type | J (Hz) | Atom1 | Multiplet1 | (ppm)          |
|-----|-----------------|-----|------|--------|-------|------------|----------------|
| 1   | 2.125           | 2   | m    | -      | 6     | M03        | 2.062 .. 2.188 |
| 2   | 2.446           | 2   | m    | -      | 7     | M02        | 2.375 .. 2.511 |
| 3   | 3.776           | 1   | t    | 6.18   | 4     | M01        | 3.726 .. 3.810 |

### Table of Assignments

| No. | Atom | Exp. Shift (ppm) | Multiplet |
|-----|------|------------------|-----------|
| 1   | 6    | 2.125            | M03       |
| 2   | 7    | 2.446            | M02       |
| 3   | 4    | 3.776            | M01       |

Spectra image with peak assignments

L-Glutamine  
 HMDB00641  
<sup>1</sup>H NMR Spectrum: 500MHz in H<sub>2</sub>O  
 Sample: 50 mM at pH 7.00  
 Referenced to DSS

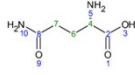

Full <sup>1</sup>H NMR Spectrum

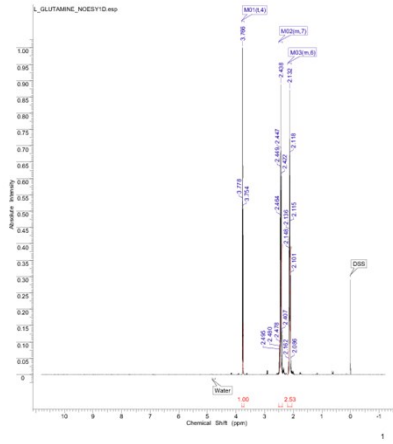

L-Glutamine  
 HMDB00641  
<sup>1</sup>H NMR Spectrum: 500MHz in H<sub>2</sub>O  
 Sample: 50 mM at pH 7.00  
 Referenced to DSS

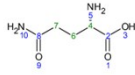

Table of Peaks

| No. | ppm   | Int     | Height | No. | ppm   | Int     | Height |
|-----|-------|---------|--------|-----|-------|---------|--------|
| 1   | 2.586 | 1042.87 | 0.5438 | 16  | 2.422 | 1215.82 | 0.8051 |
| 2   | 2.531 | 1048.97 | 0.2029 | 17  | 2.452 | 1215.58 | 0.5661 |
| 3   | 2.536 | 1052.58 | 0.2789 | 18  | 2.438 | 1218.38 | 0.8876 |
| 4   | 2.515 | 1057.67 | 0.4871 | 19  | 2.467 | 1223.18 | 0.8986 |
| 5   | 2.518 | 1058.76 | 0.8724 | 20  | 2.489 | 1228.19 | 0.8295 |
| 6   | 2.539 | 1059.48 | 0.9773 | 21  | 2.463 | 1228.37 | 0.9162 |
| 7   | 2.522 | 1060.64 | 0.4421 | 22  | 2.484 | 1231.47 | 0.4812 |
| 8   | 2.538 | 1063.51 | 0.3889 | 23  | 2.478 | 1238.48 | 0.5269 |
| 9   | 2.532 | 1065.87 | 0.8706 | 24  | 2.480 | 1239.81 | 0.5780 |
| 10  | 2.538 | 1067.63 | 0.4371 | 25  | 2.491 | 1248.95 | 0.6084 |
| 11  | 2.545 | 1072.22 | 0.3668 | 26  | 3.754 | 1878.22 | 0.5085 |
| 12  | 2.548 | 1073.62 | 0.3781 | 27  | 3.768 | 1882.42 | 0.6060 |
| 13  | 2.542 | 1080.78 | 0.6464 | 28  | 3.778 | 1888.58 | 0.5318 |
| 14  | 2.552 | 1185.28 | 0.1253 |     |       |         |        |
| 15  | 2.497 | 1093.22 | 0.1308 |     |       |         |        |

Table of Multiplets

| No. | Start | End | Type | J (Hz) | Align | Multiplet | ppm             |
|-----|-------|-----|------|--------|-------|-----------|-----------------|
| 1   | 2.525 | 2   | m    | -      | 6     | M03       | [2.502 - 2.538] |
| 2   | 2.488 | 2   | m    | -      | 7     | M02       | [2.470 - 2.518] |
| 3   | 3.766 | 1   | t    | 6.18   | 4     | M01       | [3.748 - 3.810] |

Table of Assignments

| No. | Atom | Exp. Shift (ppm) | Multiplet |
|-----|------|------------------|-----------|
| 1   | 6    | 2.525            | M03       |
| 2   | 7    | 2.488            | M02       |
| 3   | 4    | 3.766            | M01       |

2

L-Glutamine  
 HMDB00641  
<sup>1</sup>H NMR Spectrum: 500MHz in H<sub>2</sub>O  
 Sample: 50 mM at pH 7.00  
 Referenced to DSS

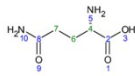

Zoomed <sup>1</sup>H NMR Spectrum

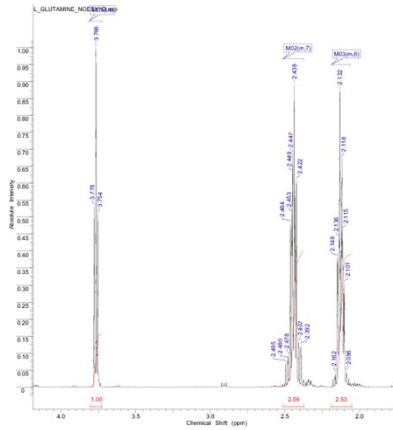

3

HMDB ID:HMDB00064

Compound name: Creatine

Spectrum type: <sup>1</sup>H NMR Spectrum

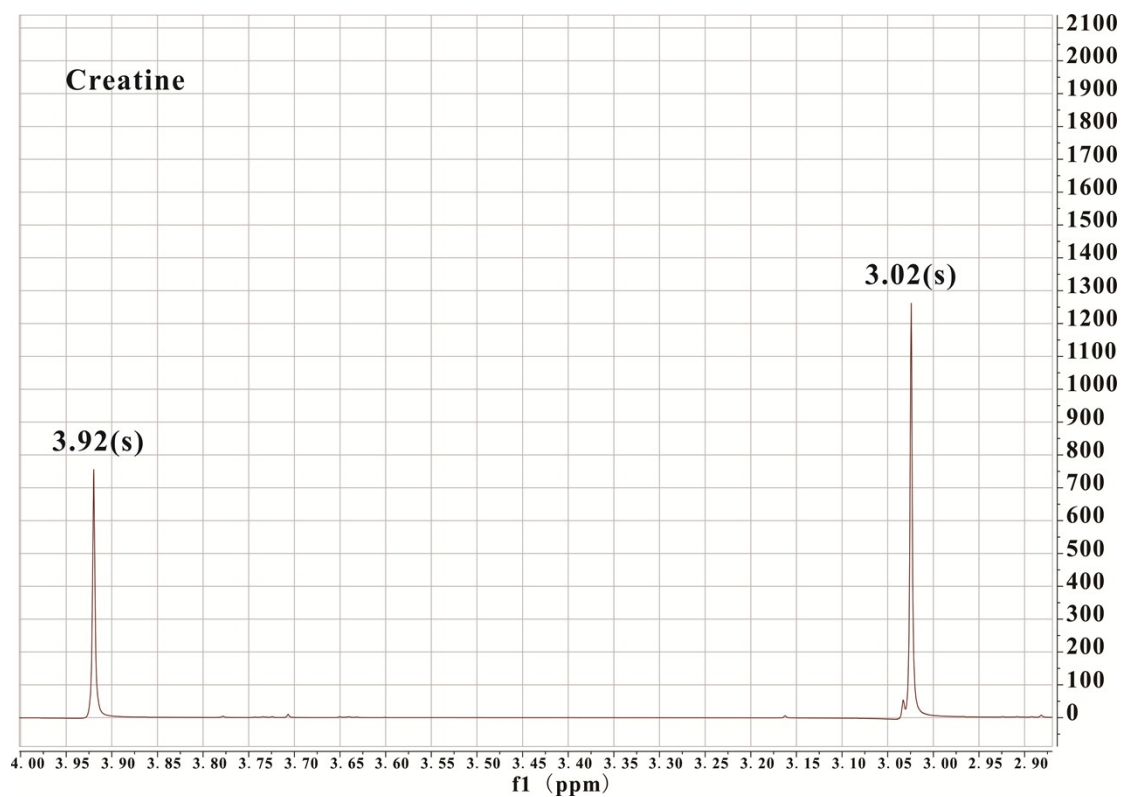

**Table of Peaks**

| No. | (ppm) | (Hz)   | Height |
|-----|-------|--------|--------|
| 1   | 3.92  | 1959.2 | 0.5503 |
| 2   | 3.02  | 1511.7 | 1.0000 |

**Table of Multiplets**

| No. | Shift1 (ppm) | H's | Type | Atom1 | Multiplet1 | (ppm)        |
|-----|--------------|-----|------|-------|------------|--------------|
| 1   | 3.92         | 32  | s    | 4     | M01        | 3.85 .. 3.94 |
| 2   | 3.02         | 58  | s    | 6     | M02        | 2.98 .. 3.07 |

**Table of Assignments**

| No. | Atom | Exp. Shift (ppm) | Multiplet |
|-----|------|------------------|-----------|
| 1   | 4    | 3.92             | M01       |
| 2   | 6    | 3.02             | M02       |

Spectra image with peak assignments

Creatine  
HMDB00064

<sup>1</sup>H NMR Spectrum : 500 MHz in H<sub>2</sub>O

Sample : 50 mM at pH 7.0

Referenced to DSS

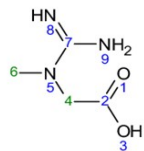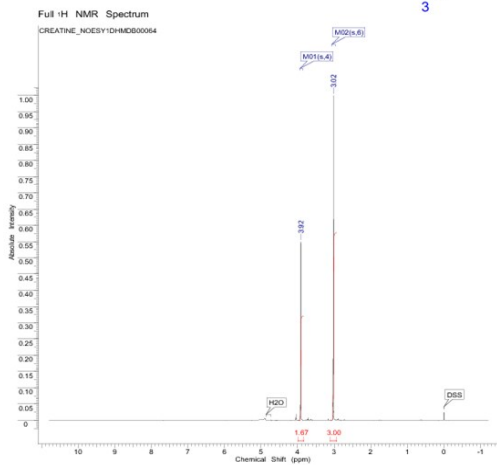

Creatine  
HMDB00064

<sup>1</sup>H NMR Spectrum : 500 MHz in H<sub>2</sub>O

Sample : 50 mM at pH 7.0

Referenced to DSS

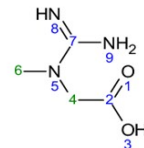

Table of Peaks

| No. | Shift (ppm) | Integration | Height |
|-----|-------------|-------------|--------|
| 1   | 3.92        | 1.67        | 0.5501 |
| 2   | 3.02        | 3.00        | 1.5000 |

Table of Multiplets

| No. | Shift (ppm) | Integration | Type | Atom1 | Multiplet1 | Chemical Shift (ppm) |
|-----|-------------|-------------|------|-------|------------|----------------------|
| 1   | 3.92        | 1.67        | s    | 4     | M01        | [3.85 - 3.98]        |
| 2   | 3.02        | 3.00        | s    | 6     | M02        | [2.98 - 3.07]        |

Table of Assignments

| No. | Atom | Exp. Shift (ppm) | Multiplet |
|-----|------|------------------|-----------|
| 1   | 4    | 3.92             | M01       |
| 2   | 6    | 3.02             | M02       |

Creatine  
HMDB00064

<sup>1</sup>H NMR Spectrum : 500 MHz in H<sub>2</sub>O

Sample : 50 mM at pH 7.0

Referenced to DSS

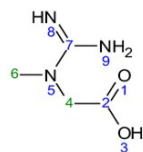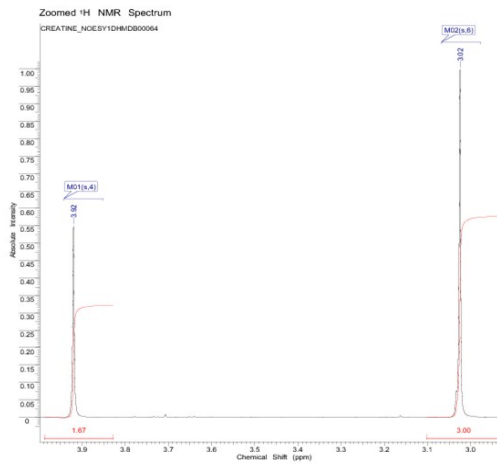

HMDB ID:HMDB00097

Compound name: Choline

Spectrum type: <sup>1</sup>H NMR Spectrum

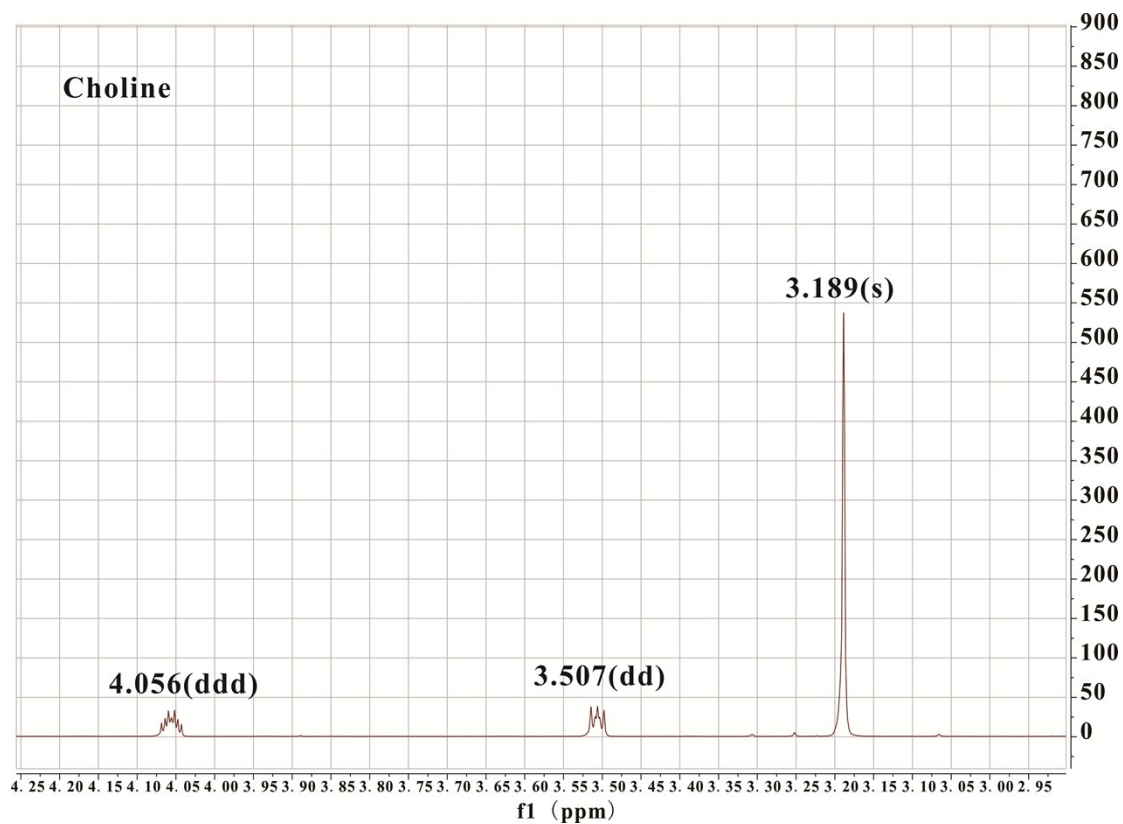

Table of Peaks

| No. | (ppm) | (Hz)   | Height |
|-----|-------|--------|--------|
| 1   | 3.189 | 1912.4 | 1.0000 |
| 2   | 3.498 | 2097.7 | 0.0597 |
| 3   | 3.503 | 2101.0 | 0.2148 |
| 4   | 3.506 | 2102.7 | 0.0724 |
| 5   | 3.509 | 2104.4 | 0.0515 |
| 6   | 3.515 | 2107.7 | 0.0670 |
| 7   | 4.043 | 2424.6 | 0.0255 |
| 8   | 4.048 | 2427.5 | 0.0395 |
| 9   | 4.052 | 2430.0 | 0.0607 |
| 10  | 4.056 | 2432.4 | 0.0471 |
| 11  | 4.060 | 2434.8 | 0.0594 |
| 12  | 4.064 | 2437.2 | 0.0412 |
| 13  | 4.068 | 2440.0 |        |

Table of Multiplets

| No. | Shift1 (ppm) | H's | Type | J (Hz)      | Atom1 | Multiplet1 | (ppm)          |
|-----|--------------|-----|------|-------------|-------|------------|----------------|
| 1   | 3.189        | 66  | s    | -           | 6 6 7 | M03        | 3.176 .. 3.205 |
| 2   | 3.507        | 14  | dd   | 5.816 4.162 | 3     | M02        | 3.492 .. 3.526 |
| 3   | 4.056        | 14  | ddd  | -           | 2     | M01        | 4.034 .. 4.080 |

### Table of Assignments

| No. | Atom | Exp. Shift (ppm) | Multiplet |
|-----|------|------------------|-----------|
| 1   | 5    | 3.189            | M03       |
| 2   | 6    | 3.189            | M03       |
| 3   | 7    | 3.189            | M03       |
| 4   | 3    | 3.507            | M02       |
| 5   | 2    | 4.056            | M01       |

Spectra image with peak assignments



Choline chloride  
 HMDB00097  
<sup>1</sup>H NMR Spectrum: 600 MHz in H<sub>2</sub>O  
 Sample: 115 mM at pH 7.00  
 Referenced to DSS

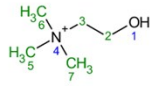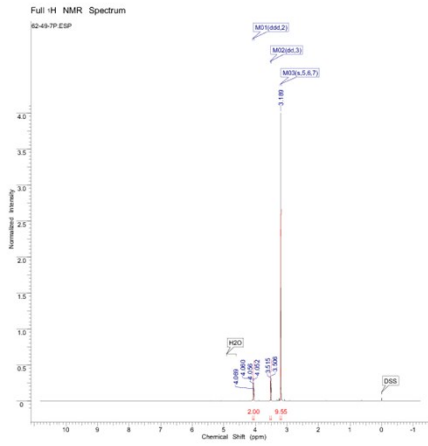

Choline chloride  
 HMDB00097  
<sup>1</sup>H NMR Spectrum: 600 MHz in H<sub>2</sub>O  
 Sample: 115 mM at pH 7.00  
 Referenced to DSS

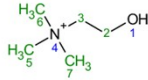

Table of Peaks

| No. | (ppm) | (Hz)   | Height |
|-----|-------|--------|--------|
| 1   | 3.189 | 1912.4 | 4.0000 |
| 2   | 3.498 | 2097.8 | 0.2425 |
| 3   | 3.508 | 2102.8 | 0.2989 |
| 4   | 3.509 | 2104.4 | 0.2154 |
| 5   | 3.515 | 2107.9 | 0.2759 |
| 6   | 4.043 | 2424.7 | 0.1029 |
| 7   | 4.048 | 2427.6 | 0.1606 |
| 8   | 4.052 | 2430.1 | 0.2473 |
| 9   | 4.056 | 2432.4 | 0.1987 |
| 10  | 4.060 | 2434.8 | 0.2585 |
| 11  | 4.064 | 2437.2 | 0.1773 |
| 12  | 4.069 | 2440.0 | 0.1210 |

Table of Multiplets

| No. | Shift (ppm) | F <sub>2</sub> | Type | J (Hz)      | Atom1 | Multiplet1      | (ppm) |
|-----|-------------|----------------|------|-------------|-------|-----------------|-------|
| 1   | 3.189       | 16             | s    | 6, 6, 7     | M02   | (3.176 - 3.202) |       |
| 2   | 3.507       | 14             | dd   | 8.816, 4.11 | M02   | (3.492 - 3.520) |       |
| 3   | 4.056       | 14             | dd   | -           | M01   | (4.034 - 4.083) |       |

Table of Assignments

| No. | Atom | Exp. Shift (ppm) | Multiplet |
|-----|------|------------------|-----------|
| 1   | 5    | 3.189            | M02       |
| 2   | 6    | 3.189            | M02       |
| 3   | 7    | 3.189            | M02       |
| 4   | 3    | 3.507            | M02       |
| 5   | 2    | 4.056            | M01       |

Choline chloride  
 HMDB00097  
<sup>1</sup>H NMR Spectrum: 600 MHz in H<sub>2</sub>O  
 Sample: 115 mM at pH 7.00  
 Referenced to DSS

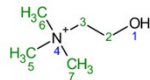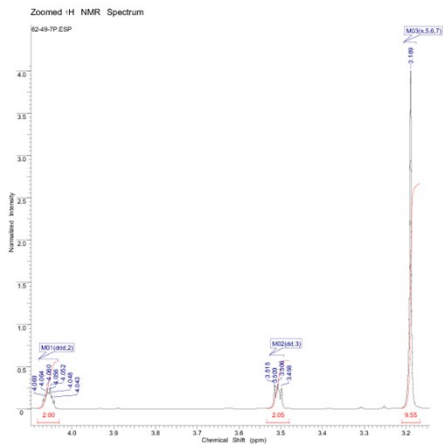

HMDB ID:HMDB00925

Compound name: Trimethylamine N-oxide

Spectrum type: <sup>1</sup>H NMR Spectrum

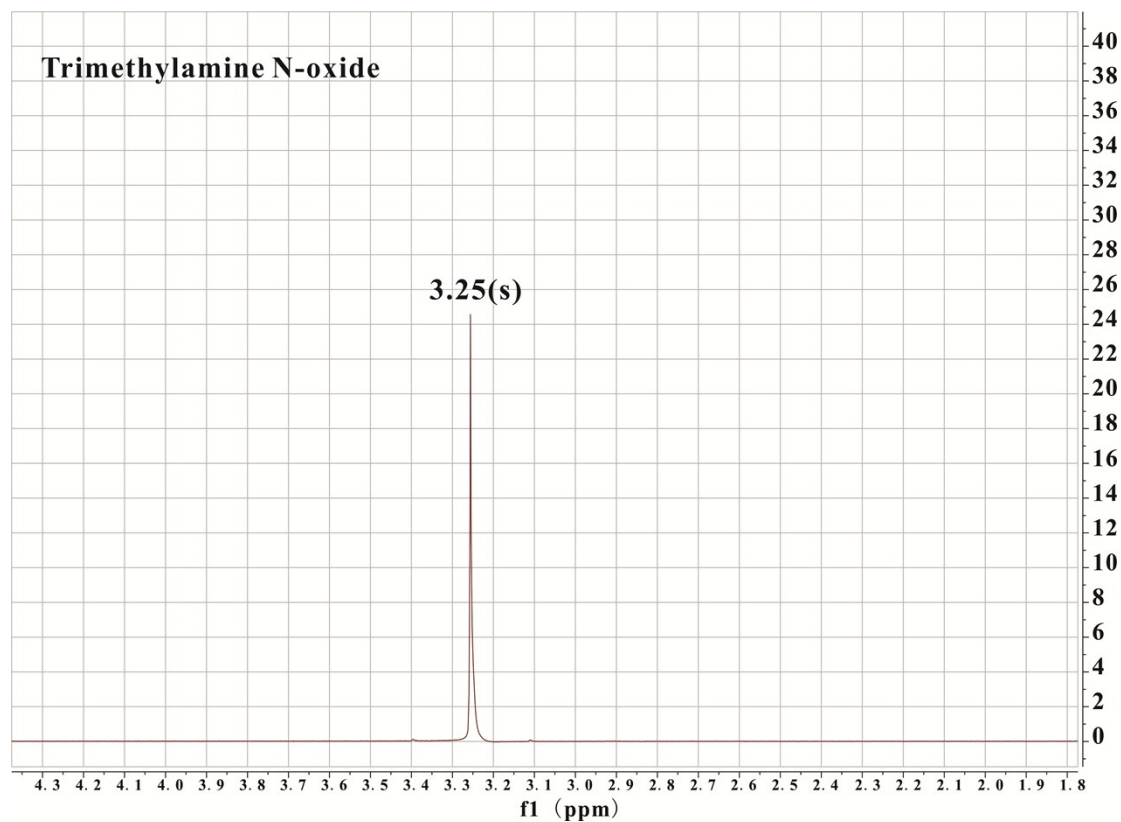

Table of Peaks

| No. | (ppm) | (Hz)   | Height |
|-----|-------|--------|--------|
| 1   | 3.25  | 1626.5 | 1.0000 |

Table of Multiplets

| No. | Shift1 (ppm) | H's | Type | Atom1 | Multiplet1 | (ppm)        |
|-----|--------------|-----|------|-------|------------|--------------|
| 1   | 3.25         | 123 | s    | 3 1 4 | M01        | 3.22 .. 3.27 |

Table of Assignments

| No. | Atom | Exp. Shift (ppm) | Multiplet |
|-----|------|------------------|-----------|
| 1   | 3    | 3.25             | M01       |
| 2   | 1    | 3.25             | M01       |
| 3   | 4    | 3.25             | M01       |

Spectra image with peak assignments

Trimethylamine oxide  
 HMDB00925  
<sup>1</sup>H NMR Spectrum: 500MHz in H<sub>2</sub>O  
 Sample: ~40mM in H<sub>2</sub>O and pH 7.00  
 Referenced to DSS

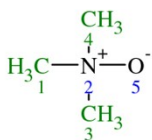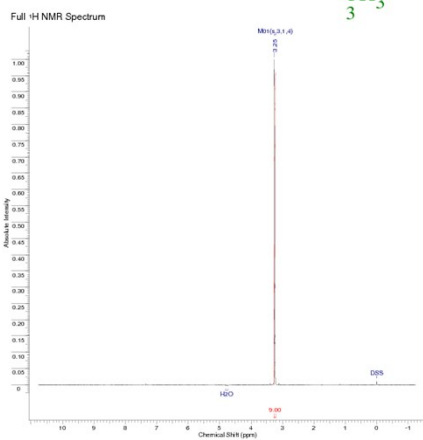

Trimethylamine oxide  
 HMDB00925  
<sup>1</sup>H NMR Spectrum: 500MHz in H<sub>2</sub>O  
 Sample: ~40mM in H<sub>2</sub>O and pH 7.00  
 Referenced to DSS

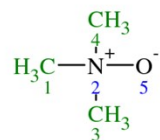

Table of Peaks

| No. | ppm  | Int.   | Height |
|-----|------|--------|--------|
| 1   | 3.25 | 1426.5 | 1.0000 |

Table of Assignments

| No. | Atom | Exp. Shift (ppm) | Multiplet |
|-----|------|------------------|-----------|
| 1   | 3    | 3.25             | MR        |
| 2   | 1    | 3.25             | MR        |
| 3   | 4    | 3.25             | MR        |

Table of Multiplets

| No. | Shift (ppm) | F <sub>2</sub> | Type | Atom    | Multiplet | ppm           |
|-----|-------------|----------------|------|---------|-----------|---------------|
| 1   | 3.25        | 1.25           | s    | 3, 1, 4 | MR        | [3.22 - 3.27] |

Trimethylamine oxide  
 HMDB00925  
<sup>1</sup>H NMR Spectrum: 500MHz in H<sub>2</sub>O  
 Sample: ~40mM in H<sub>2</sub>O and pH 7.00  
 Referenced to DSS

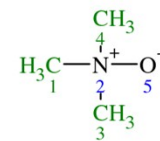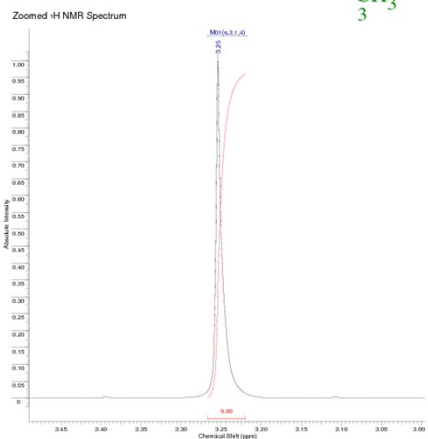

HMDB ID:HMDB00043

Compound name: Betaine

Spectrum type: <sup>1</sup>H NMR Spectrum

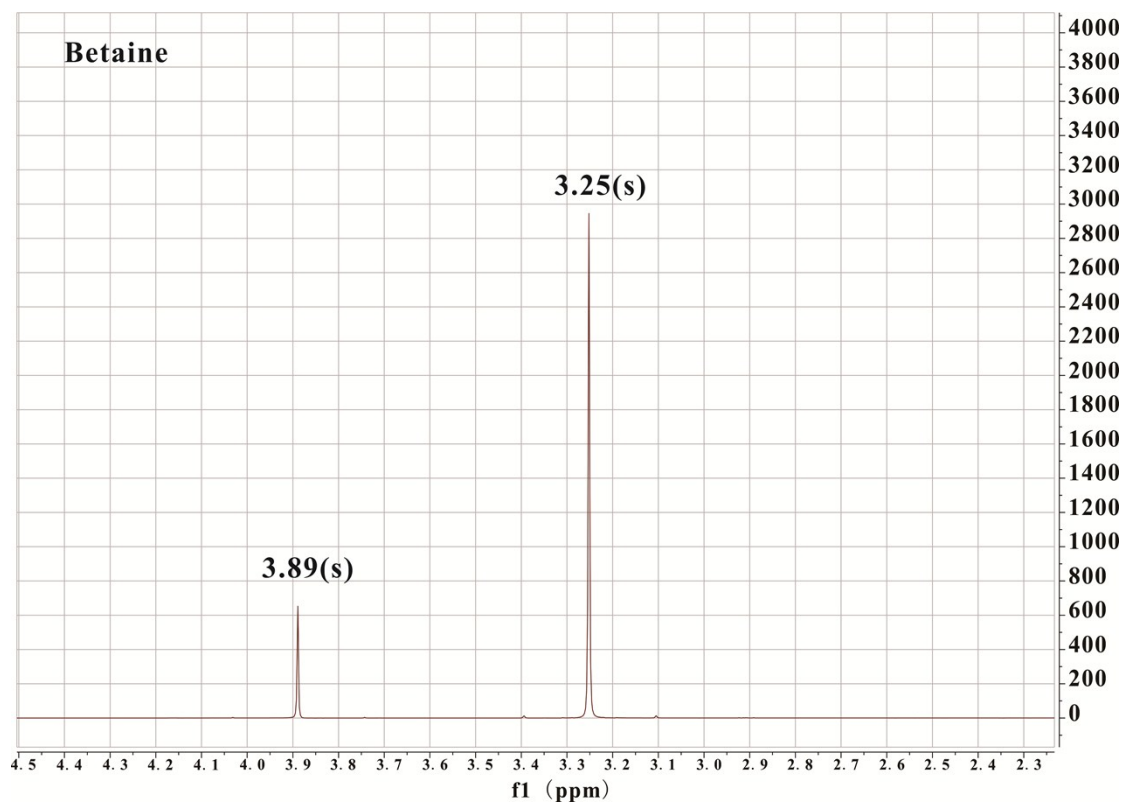

Table of Peaks

| No. | (ppm) | (Hz)   | Height |
|-----|-------|--------|--------|
| 1   | 3.89  | 1943.8 | 0.1878 |
| 2   | 3.25  | 1625.3 | 1.0000 |

Table of Multiplets

| No. | Shift1 (ppm) | H's | Type | Atom1 | Multiplet1 | (ppm)        |
|-----|--------------|-----|------|-------|------------|--------------|
| 1   | 3.89         | 15  | s    | 3     | M01        | 3.84 .. 3.93 |
| 2   | 3.25         | 83  | s    | 7 5 8 | M02        | 3.19 .. 3.31 |

Table of Assignments

| No. | Atom | Exp. Shift (ppm) | Multiplet |
|-----|------|------------------|-----------|
| 1   | 3    | 3.89             | M01       |
| 2   | 5    | 3.25             | M02       |
| 3   | 8    | 3.25             | M02       |
| 4   | 7    | 3.25             | M02       |

Spectra image with peak assignments

Betaine  
 HMDB00043  
<sup>1</sup>H NMR Spectrum : 500 MHz in H<sub>2</sub>O  
 Sample : 50 mM at pH 7.0 in H<sub>2</sub>O  
 Referenced to DSS

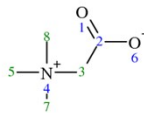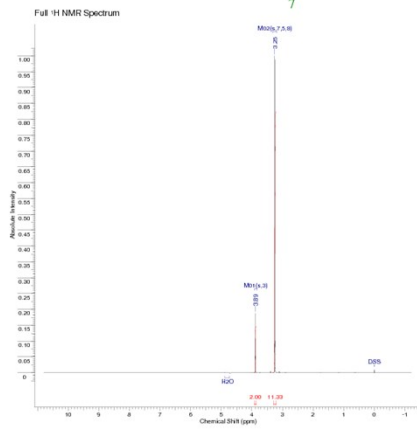

Betaine  
 HMDB00043  
<sup>1</sup>H NMR Spectrum : 500 MHz in H<sub>2</sub>O  
 Sample : 50 mM at pH 7.0 in H<sub>2</sub>O  
 Referenced to DSS

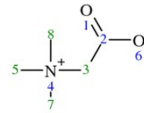

Table of Peaks

| No. | Chemical Shift (ppm) | Integration | Height |
|-----|----------------------|-------------|--------|
| 1   | 3.25                 | 2.00        | 0.1000 |
| 2   | 3.05                 | 11.25       | 1.0000 |

Table of Multiplets

| No. | Chemical Shift (ppm) | Integration | Type | Atom    | Multiplet | Height |
|-----|----------------------|-------------|------|---------|-----------|--------|
| 1   | 3.25                 | 2.00        | s    | 3       | triplet   | 0.1000 |
| 2   | 3.05                 | 11.25       | s    | 5, 6, 7 | triplet   | 1.0000 |

Table of Assignments

| No. | Atom | Chemical Shift (ppm) | Multiplet |
|-----|------|----------------------|-----------|
| 1   | 3    | 3.25                 | triplet   |
| 2   | 5    | 3.05                 | triplet   |
| 3   | 6    | 3.05                 | triplet   |
| 4   | 7    | 3.05                 | triplet   |

Betaine  
 HMDB00043  
<sup>1</sup>H NMR Spectrum : 500 MHz in H<sub>2</sub>O  
 Sample : 50 mM at pH 7.0 in H<sub>2</sub>O  
 Referenced to DSS

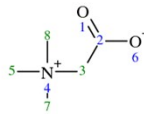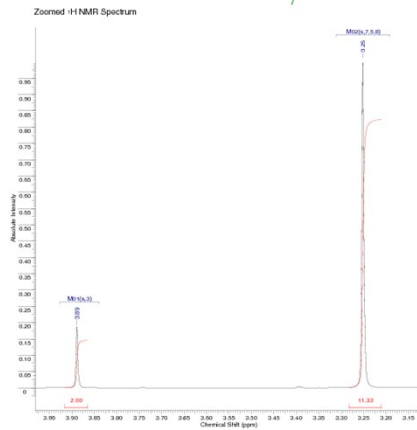

HMDB ID:HMDB00647

Compound name: L-Tyrosine

Spectrum type:1H NMR Spectrum

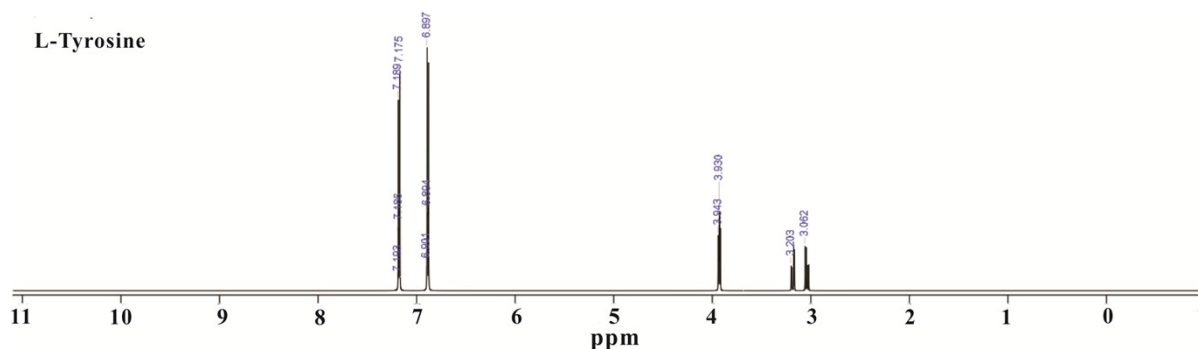

Table of Peaks

| No. | (ppm) | Height  | No. | (ppm) | Height |
|-----|-------|---------|-----|-------|--------|
| 1   | 7.193 | -0.0004 | 13  | 3.943 | 0.0077 |
| 2   | 7.189 | 0.0263  | 14  | 3.934 | 0.0096 |
| 3   | 7.186 | 0.0058  | 15  | 3.930 | 0.0106 |
| 4   | 7.178 | 0.0079  | 16  | 3.921 | 0.0087 |
| 5   | 7.175 | 0.0300  | 17  | 3.203 | 0.0035 |
| 6   | 7.170 | 0.0006  | 18  | 3.194 | 0.0033 |
| 7   | 6.901 | 0.0010  | 19  | 3.178 | 0.0064 |
| 8   | 6.897 | 0.0335  | 20  | 3.170 | 0.0057 |
| 9   | 6.894 | 0.0070  | 21  | 3.062 | 0.0063 |
| 10  | 6.886 | 0.0083  | 22  | 3.049 | 0.0061 |
| 11  | 6.883 | 0.0313  | 23  | 3.037 | 0.0036 |
| 12  | 6.877 | 0.0003  | 24  | 3.024 | 0.0037 |

Table of Multiplets

| No. | Shift1 (ppm) | H's | Type | Atom1 | Multiplet1 | (ppm)          |
|-----|--------------|-----|------|-------|------------|----------------|
| 1   | 3.024        | 0   | dd   | 8     | M05        | 3.014 .. 3.072 |
| 2   | 3.170        | 0   | dd   | 8     | M04        | 3.161 .. 3.213 |
| 3   | 3.921        | 0   | dd   | 9     | M03        | 3.909 .. 3.954 |
| 4   | 6.877        | 2   | m    | 2 6   | M02        | 6.868 .. 6.909 |
| 5   | 7.710        | 2   | m    | 3 5   | M01        | 7.161 .. 7.201 |

Table of Assignments

| No. | Atom | Exp. Shift (ppm) | Multiplet |
|-----|------|------------------|-----------|
| 1   | 8    | 3.024            | M05       |
| 2   | 8    | 3.170            | M04       |
| 3   | 9    | 3.921            | M03       |
| 4   | 2    | 6.877            | M02       |
| 5   | 6    | 6.877            | M02       |
| 6   | 3    | 7.710            | M01       |
| 7   | 5    | 7.710            | M01       |

# Spectra image with peak assignments

L-Tyrosine (HMDB00158)  
 1H NMR spectrum: 600 MHz in H2O  
 Sample: 2 mM at pH 7.0  
 Referenced to DSS

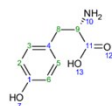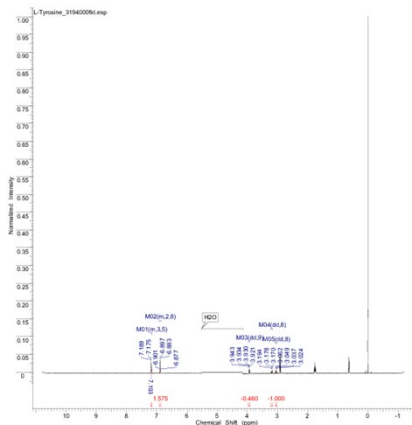

L-Tyrosine (HMDB00158)  
 1H NMR spectrum: 600 MHz in H2O  
 Sample: 2 mM at pH 7.0  
 Referenced to DSS

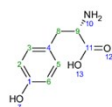

Table of Peaks

| No. | (ppm) | Height |
|-----|-------|--------|
| 1   | 7.153 | 0.0004 |
| 2   | 7.189 | 0.0003 |
| 3   | 7.186 | 0.0004 |
| 4   | 7.178 | 0.0009 |
| 5   | 7.178 | 0.0005 |
| 6   | 7.170 | 0.0006 |
| 7   | 6.901 | 0.0010 |
| 8   | 6.887 | 0.0016 |
| 9   | 6.884 | 0.0010 |
| 10  | 6.880 | 0.0003 |
| 11  | 6.883 | 0.0013 |
| 12  | 6.877 | 0.0003 |
| 13  | 3.943 | 0.0027 |
| 14  | 3.934 | 0.0006 |
| 15  | 3.930 | 0.0106 |
| 16  | 3.921 | 0.0007 |
| 17  | 3.203 | 0.0035 |
| 18  | 3.194 | 0.0033 |
| 19  | 3.178 | 0.0004 |
| 20  | 3.170 | 0.0007 |
| 21  | 3.042 | 0.0063 |
| 22  | 3.048 | 0.0011 |
| 23  | 3.037 | 0.0038 |
| 24  | 3.024 | 0.0037 |

Table of Multiplets

| No. | Start (ppm) | End (ppm) | Type | Assign1 | Multiplet | (ppm)           |
|-----|-------------|-----------|------|---------|-----------|-----------------|
| 1   | 3.024       | 0         | qd   | a       | M05       | (3.024 - 3.072) |
| 2   | 3.170       | 0         | qd   | b       | M04       | (3.170 - 3.218) |
| 3   | 3.192       | 0         | qd   | b       | M03       | (3.192 - 3.240) |
| 4   | 6.877       | 2         | m    | c, d, e | M02       | (6.877 - 6.901) |
| 5   | 7.170       | 2         | m    | c, d, e | M01       | (7.170 - 7.201) |

Table of Assignments

| No. | Atom | Exp. Shift (ppm) | Multiplet |
|-----|------|------------------|-----------|
| 1   | O    | 3.024            | M05       |
| 2   | O    | 3.170            | M04       |
| 3   | O    | 3.192            | M03       |
| 4   | O    | 6.877            | M02       |
| 5   | O    | 6.877            | M02       |
| 6   | O    | 7.170            | M01       |
| 7   | O    | 7.170            | M01       |

L-Tyrosine (HMDB00158)  
 1H NMR spectrum: 600 MHz in H2O  
 Sample: 2 mM at pH 7.0  
 Referenced to DSS

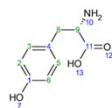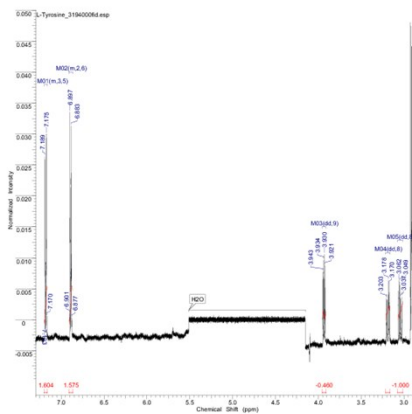

HMDB ID:HMDB00094

Compound name: Citric acid

Spectrum type:  $^1\text{H}$  NMR Spectrum

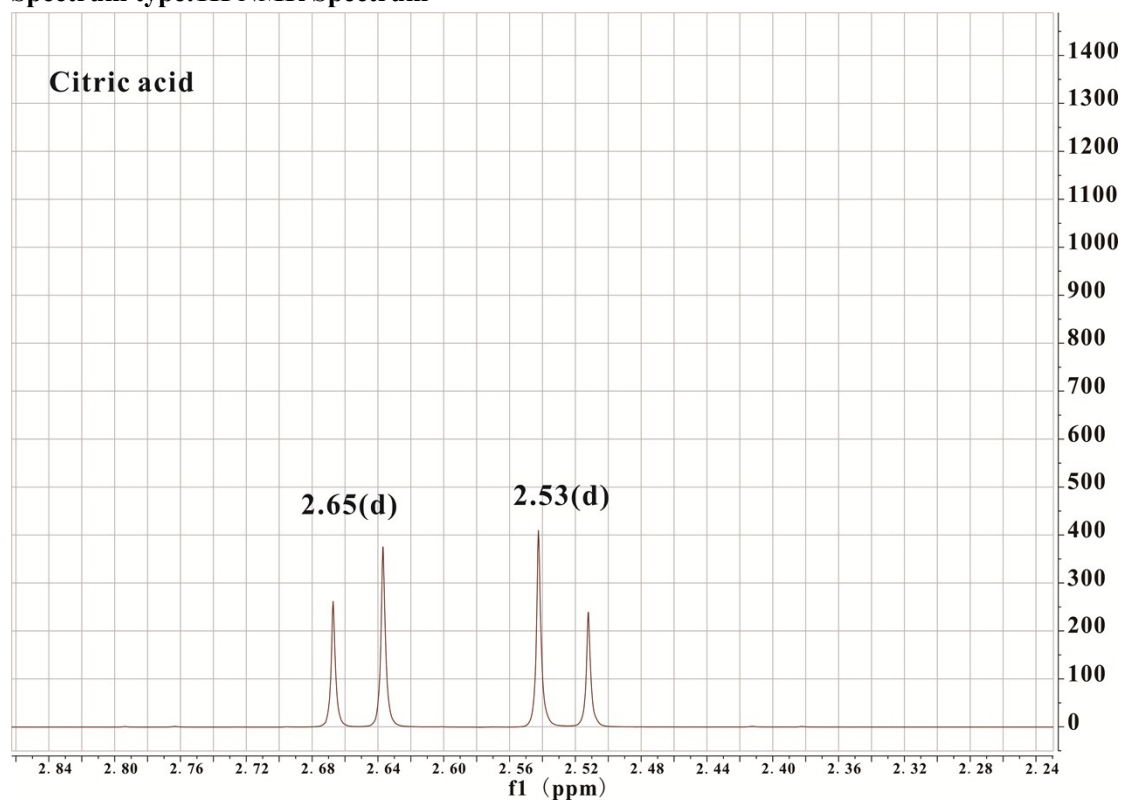

Table of Peaks

| No. | (ppm) | (Hz)   | Height |
|-----|-------|--------|--------|
| 1   | 2.67  | 1333.2 | 0.6328 |
| 2   | 2.64  | 1318.1 | 0.9238 |
| 3   | 2.54  | 1270.8 | 1.0000 |
| 4   | 2.51  | 1255.7 | 0.5785 |

Table of Multiplets

| No. | Shift1 (ppm) | H'<br>s | Type | J (Hz) | Atom1 | Multiplet1 | (ppm)        |
|-----|--------------|---------|------|--------|-------|------------|--------------|
| 1   | 2.65         | 48      | d    | 15.16  | 6a 3a | M01        | 2.61 .. 2.70 |
| 2   | 2.53         | 49      | d    | -      | 6b 3b | M02        | 2.48 .. 2.57 |

Table of Assignments

| No. | Atom | Exp. Shift (ppm) | Multiplet |
|-----|------|------------------|-----------|
| 1   | 3a   | 2.65             | M01       |
| 2   | 6a   | 2.65             | M01       |
| 3   | 3b   | 2.53             | M02       |
| 4   | 6b   | 2.53             | M02       |



## Spectra image with peak assignments

Citric acid  
 HMDB00094  
<sup>1</sup>H NMR Spectrum : 500 MHz in H<sub>2</sub>O  
 Sample : 50 mM at pH 7.0 in H<sub>2</sub>O  
 Referenced to DSS

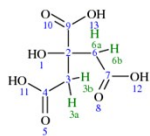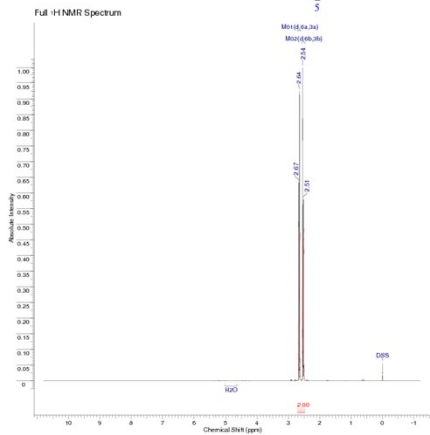

Citric acid  
 HMDB00094  
<sup>1</sup>H NMR Spectrum : 500 MHz in H<sub>2</sub>O  
 Sample : 50 mM at pH 7.0 in H<sub>2</sub>O  
 Referenced to DSS

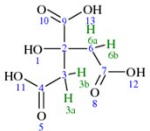

Table of Peaks

| No. | Chem. Shift (ppm) | Integration | Multiplet |
|-----|-------------------|-------------|-----------|
| 1   | 2.67              | 1.0000      | t         |
| 2   | 2.54              | 1.0000      | t         |
| 3   | 2.34              | 1.0000      | t         |
| 4   | 2.21              | 0.5000      | t         |

Table of Multiplets

| No. | Chem. Shift (ppm) | Integration | Type | J (Hz) | Abundance | Multiplet    | Chem. Shift (ppm) |
|-----|-------------------|-------------|------|--------|-----------|--------------|-------------------|
| 1   | 2.65              | 1.00        | d    | 15.10  | 6h, 3a    | Triplet      | (2.61, 2.70)      |
| 2   | 2.53              | 1.00        | d    | 6h, 3a | Triplet   | (2.49, 2.57) |                   |

Table of Assignments

| No. | Atom | Exp. Shift (ppm) | Multiplet |
|-----|------|------------------|-----------|
| 1   | 6a   | 2.65             | Triplet   |
| 2   | 6b   | 2.53             | Triplet   |
| 3   | 3a   | 2.34             | Triplet   |
| 4   | 3b   | 2.21             | Triplet   |

Citric acid  
 HMDB00094  
<sup>1</sup>H NMR Spectrum : 500 MHz in H<sub>2</sub>O  
 Sample : 50 mM at pH 7.0 in H<sub>2</sub>O  
 Referenced to DSS

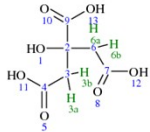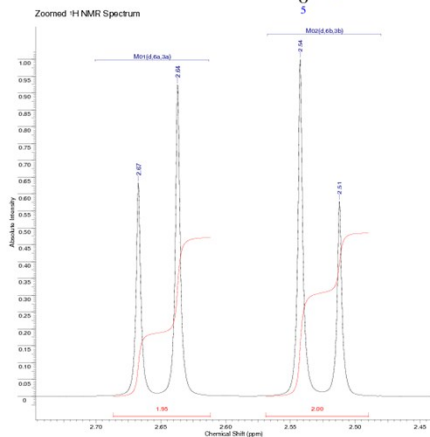

HMDB ID:HMDB00131

Compound name: Glycerol

Spectrum type: <sup>1</sup>H NMR Spectrum

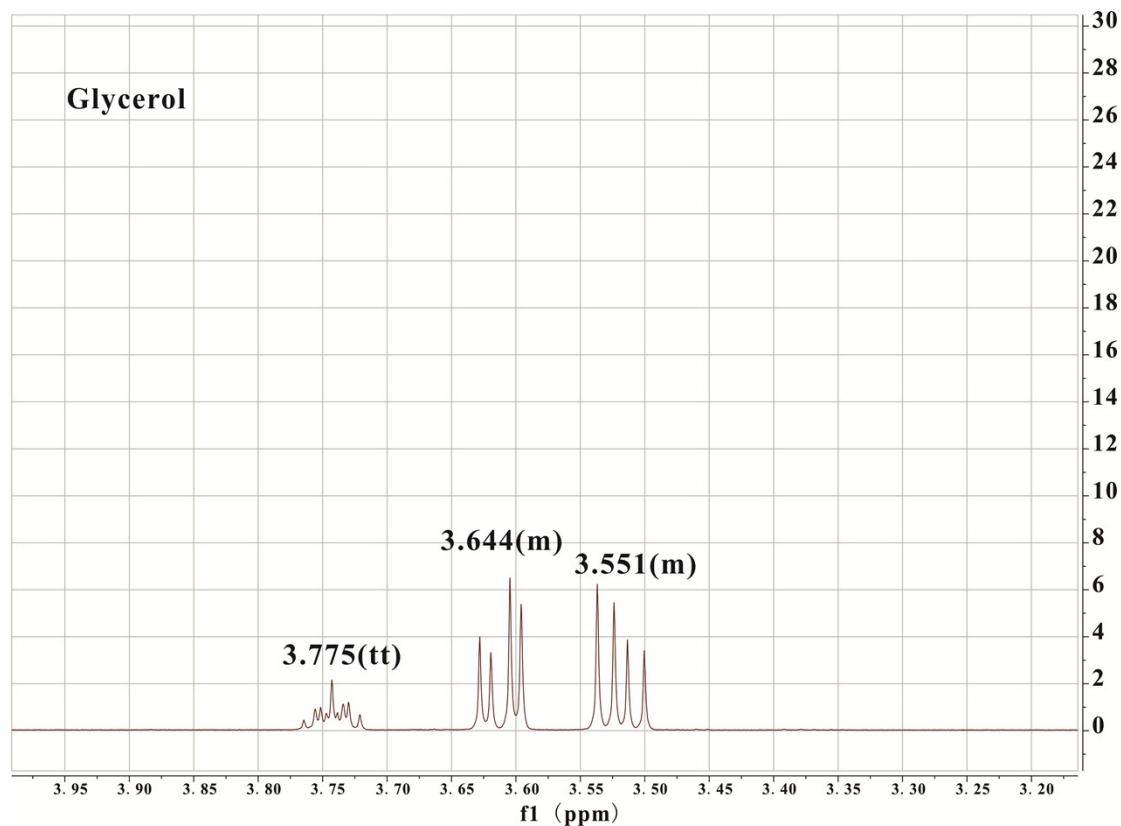

Table of Peaks

| No. | (ppm) | (Hz)   | Height |
|-----|-------|--------|--------|
| 1   | 3.532 | 1765.6 | 2.1117 |
| 2   | 3.545 | 1772.1 | 2.3961 |
| 3   | 3.556 | 1777.3 | 3.4290 |
| 4   | 3.569 | 1783.9 | 3.8592 |
| 5   | 3.628 | 1813.4 | 3.4374 |
| 6   | 3.637 | 1817.7 | 4.0000 |
| 7   | 3.651 | 1825.1 | 2.1062 |
| 8   | 3.660 | 1825.9 | 2.4318 |
| 9   | 3.753 | 1875.9 | 0.4347 |
| 10  | 3.762 | 1880.3 | 0.8238 |
| 11  | 3.766 | 1882.4 | 0.8279 |
| 12  | 3.771 | 1884.7 | 0.6044 |
| 13  | 3.775 | 1886.8 | 1.3931 |
| 14  | 3.779 | 1888.9 | 0.5713 |
| 15  | 3.784 | 1891.1 | 0.6860 |
| 16  | 3.788 | 1893.2 | 0.6303 |
| 17  | 3.797 | 1897.6 | 0.2718 |

Table of Multiplets

| No. | Shift1 (ppm) | H's | Type | J (Hz)      | Atom1 | Multiplet1 | (ppm)          |
|-----|--------------|-----|------|-------------|-------|------------|----------------|
| 1   | 3.551        | 37  | m    | -           | 3 5   | M03        | 3.525 .. 3.577 |
| 2   | 3.644        | 38  | m    | -           | 3 5   | M02        | 3.618 .. 3.670 |
| 3   | 3.775        | 18  | tt   | 6.463 4.404 | 2     | M01        | 3.720 .. 3.821 |

### Table of Assignments

| No. | Atom | Exp. Shift (ppm) | Multiplet |
|-----|------|------------------|-----------|
| 1   | 3    | 3.551            | M03       |
| 2   | 5    | 3.551            | M03       |
| 3   | 3    | 3.644            | M02       |
| 4   | 5    | 3.644            | M02       |
| 5   | 2    | 3.775            | M01       |

Spectra image with peak assignments

Glycerol  
HMDB00131  
<sup>1</sup>H NMR Spectrum: 500 MHz in H2O  
Sample: 90 mM at pH 7.0  
Referenced to DSS

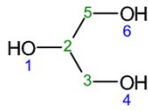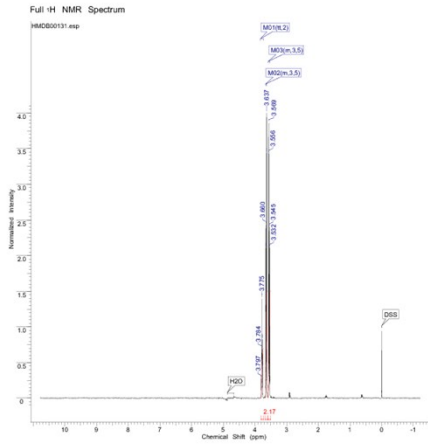

Glycerol  
HMDB00131  
<sup>1</sup>H NMR Spectrum: 500 MHz in H2O  
Sample: 90 mM at pH 7.0  
Referenced to DSS

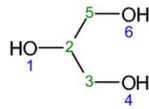

Table of Peaks

| No. | ppm   | Integration | Height |
|-----|-------|-------------|--------|
| 1   | 3.552 | 1.000       | 2.117  |
| 2   | 3.545 | 1.772       | 2.391  |
| 3   | 3.556 | 1.773       | 3.650  |
| 4   | 3.569 | 1.783       | 3.632  |
| 5   | 3.628 | 1.814       | 2.434  |
| 6   | 3.637 | 1.817       | 4.000  |
| 7   | 3.651 | 1.825       | 2.192  |
| 8   | 3.660 | 1.829       | 2.419  |
| 9   | 3.753 | 1.975       | 0.4347 |
| 10  | 3.762 | 1.983       | 0.628  |
| 11  | 3.789 | 1.982       | 0.6279 |
| 12  | 3.771 | 1.987       | 0.634  |
| 13  | 3.775 | 1.988       | 1.991  |
| 14  | 3.779 | 1.989       | 0.513  |
| 15  | 3.784 | 1.991       | 0.6880 |
| 16  | 3.788 | 1.992       | 0.630  |
| 17  | 3.797 | 1.997       | 0.2718 |

Table of Multiplets

| No. | Start | End | Type | J (Hz)     | AbsInt | Multiplet | ppm           |
|-----|-------|-----|------|------------|--------|-----------|---------------|
| 1   | 3.551 | 3.7 | m    | -          | 3.5    | M3        | [3.529-3.577] |
| 2   | 3.644 | 3.8 | m    | -          | 3.5    | M2        | [3.618-3.676] |
| 3   | 3.775 | 3.8 | d    | 6.465, 4.4 | 2      | M1        | [3.720-3.821] |

Table of Assignments

| No. | Atom | Exp. Shift (ppm) | Multiplet |
|-----|------|------------------|-----------|
| 1   | 1    | 3.551            | M3        |
| 2   | 5    | 3.551            | M3        |
| 3   | 3    | 3.644            | M2        |
| 4   | 5    | 3.644            | M2        |
| 5   | 2    | 3.775            | M1        |

Glycerol  
HMDB00131  
<sup>1</sup>H NMR Spectrum: 500 MHz in H2O  
Sample: 90 mM at pH 7.0  
Referenced to DSS

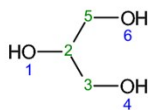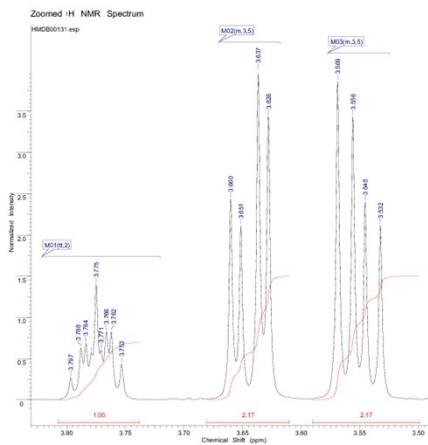

Supplement: c7ra04057a1.pdf [file c7ra04057a1.pdf]
